# Supplementary material for: Extraction and high-throughput sequencing of oak heartwood DNA: Assessing the feasibility of genome-wide DNA methylation profiling
Source: PLoS One. 2021 Nov 18;16(11):e0254971. doi: 10.1371/journal.pone.0254971 (PMC8601515; doi:10.1371/journal.pone.0254971)
Supplement: S1 File — Details on the protocol used for the preparation and the extraction of DNA from the oak wood samples; measured DNA and phenolic compound concentrations where available; outcome of the WGS library preparation where attempted. (XLSX) [file pone.0254971.s005.xlsx]

## Sheet: DNA_extraction_summary_v4_pheno
Wood type	Decon protocol	Homog protocol	Wood age (AD)	Treatment protocol	Wood source	Wash protocol	Lysis buffer	Lysis duration (h)	Lysis temp (C)	Wood input (mg)	DNA conc (ng/ul)	DNA yield (ng/mg wood)	original DNA yield (ng/mg wood)	DNA precipitation	Library prep outcome	Extraction date	Phenol conc (GA-eq uM)	Single-tube library prep outcome	Experiment	Notes
sapwood	5%_bleach,60%_EtOH,water	burr-grinding,bead-beating	2005-2014	air-dried,silica	Dulwich	TNE	STE+2%_SDS+6%_PVP	4	65	37.01	2.38	6.43	6.43	2x_vol_99%_ethanol		2016-04-22			unknown
sapwood	5%_bleach,60%_EtOH,water	burr-grinding,bead-beating	2005-2014	air-dried,silica	Dulwich	TNE	STE+2%_SDS+6%_PVP	4	65	41.75	2.86	6.85	6.85	2x_vol_99%_ethanol		2016-04-22			unknown
sapwood	5%_bleach,60%_EtOH,water	burr-grinding,bead-beating	2005-2014	air-dried,silica	Dulwich	TNE	STE+2%_SDS+6%_PVP	4	65	43.76	2.84	6.49	6.49	2x_vol_99%_ethanol		2016-04-22			unknown
sapwood	5%_bleach,60%_EtOH,water	burr-grinding,bead-beating	2005-2014	air-dried,silica	Dulwich	TNE	STE+2%_SDS+6%_PVP	4	65	28.02	2.9	10.35	10.35	2x_vol_99%_ethanol		2016-04-22			unknown
sapwood	5%_bleach,60%_EtOH,water	burr-grinding,bead-beating	2005-2014	air-dried,silica	Dulwich	TNE	STE+2%_SDS+6%_PVP	4	65	36.02	3.22	8.94	8.94	2x_vol_99%_ethanol		2016-04-22			unknown
sapwood	5%_bleach,60%_EtOH,water	burr-grinding,bead-beating	2005-2014	air-dried,silica	Dulwich	TNE	STE+2%_SDS+6%_PVP	4	65	32.89	2.7	8.21	8.21	2x_vol_99%_ethanol		2016-04-22			unknown
heartwood	5%_bleach,water	burr-grinding,bead-beating	1965-1995	air-dried,silica	Dulwich	TNE	STE+2%_SDS+6%_PVP	4	65	33.7	0.091	0.27	0.27	2x_vol_99%_ethanol		2016-04-28			Bleach
heartwood	60%_EtOH,water	burr-grinding,bead-beating	1965-1995	air-dried,silica	Dulwich	TNE	STE+2%_SDS+6%_PVP	4	65	33.33	0.13	0.39	0.39	2x_vol_99%_ethanol		2016-04-28			Bleach
heartwood	5%_bleach,water	burr-grinding,bead-beating	1965-1995	air-dried,silica	Dulwich	TNE	STE+2%_SDS+6%_PVP	4	65	27.77	0.0972	0.35	0.35	2x_vol_99%_ethanol		2016-04-28			Bleach
heartwood	1%_bleach,water	burr-grinding,bead-beating	1965-1995	air-dried,silica	Dulwich	TNE	STE+2%_SDS+6%_PVP	4	65	23.04	0.0576	0.25	0.25	2x_vol_99%_ethanol		2016-04-28			Bleach
heartwood	1%_bleach,water	burr-grinding,bead-beating	1965-1995	air-dried,silica	Dulwich	TNE	STE+2%_SDS+6%_PVP	4	65	32.75	0.0524	0.16	0.16	2x_vol_99%_ethanol		2016-04-28			Bleach
heartwood	1%_bleach,water	burr-grinding,bead-beating	1965-1995	air-dried,silica	Dulwich	TNE	STE+2%_SDS+6%_PVP	4	65	43.75	0.105	0.24	0.24	2x_vol_99%_ethanol		2016-04-28			Bleach
heartwood	60%_EtOH,water	burr-grinding,bead-beating	1965-1995	air-dried,silica	Dulwich	TNE	STE+2%_SDS+6%_PVP	4	65	30	0.105	0.35	0.35	2x_vol_99%_ethanol		2016-04-28			Bleach
heartwood	60%_EtOH,water	burr-grinding,bead-beating	1965-1995	air-dried,silica	Dulwich	TNE	STE+2%_SDS+6%_PVP	4	65	33.67	0.101	0.3	0.3	2x_vol_99%_ethanol		2016-04-28			Bleach
heartwood	5%_bleach,water	burr-grinding,bead-beating	1965-1995	air-dried,silica	Dulwich	TNE	STE+2%_SDS+6%_PVP	4	65	44.11	0.0838	0.19	0.19	2x_vol_99%_ethanol		2016-04-28			Bleach
sapwood	5%_bleach,60%_EtOH,water	burr-grinding,bead-beating	2005-2014	air-dried,silica	Dulwich	TNE	STE+2%_SDS+6%_PVP	4	65	35.03	2.2	6.28	6.28	2x_vol_99%_ethanol		2016-04-28			Bleach
sapwood	5%_bleach,60%_EtOH,water	burr-grinding,bead-beating	2005-2014	air-dried,silica	Dulwich	TNE	STE+2%_SDS+6%_PVP	4	65	37.82	2.5	6.61	6.61	2x_vol_99%_ethanol		2016-04-28			Bleach
sapwood	5%_bleach,60%_EtOH,water	burr-grinding,bead-beating	2005-2014	air-dried,silica	Dulwich	TNE	STE+2%_SDS+6%_PVP	4	65	22.31	2.94	13.18	13.18	2x_vol_99%_ethanol		2016-04-28			Bleach
heartwood	60%_EtOH,water	burr-grinding,bead-beating	1965-1995	air-dried,silica	Dulwich	TNE	STE+2%_SDS+6%_PVP+40mM_ascorbic_acid	4	65	13.83	0.0166	0.12	0.12	2x_vol_99%_ethanol		2016-06-09			Ascorbic acid
heartwood	60%_EtOH,water	burr-grinding,bead-beating	1965-1995	air-dried,silica	Dulwich	TNE	STE+2%_SDS+6%_PVP+20mM_ascorbic_acid	4	65	18.2	0.0364	0.2	0.2	2x_vol_99%_ethanol		2016-06-09			Ascorbic acid
heartwood	60%_EtOH,water	burr-grinding,bead-beating	1965-1995	air-dried,silica	Dulwich	TNE	STE+2%_SDS+6%_PVP+40mM_ascorbic_acid	4	65	20	0.054	0.27	0.27	2x_vol_99%_ethanol		2016-06-09			Ascorbic acid
heartwood	60%_EtOH,water	burr-grinding,bead-beating	1965-1995	air-dried,silica	Dulwich	TNE	STE+2%_SDS+6%_PVP+60mM_ascorbic_acid	4	65	20	0.062	0.31	0.31	2x_vol_99%_ethanol		2016-06-09			Ascorbic acid
heartwood	60%_EtOH,water	burr-grinding,bead-beating	1965-1995	air-dried,silica	Dulwich	TNE	STE+2%_SDS+6%_PVP+60mM_ascorbic_acid	4	65	21.1	0.0422	0.2	0.2	2x_vol_99%_ethanol		2016-06-09			Ascorbic acid
heartwood	60%_EtOH,water	burr-grinding,bead-beating	1965-1995	air-dried,silica	Dulwich	TNE	STE+2%_SDS+6%_PVP+60mM_ascorbic_acid	4	65	17.94	0.0556	0.31	0.31	2x_vol_99%_ethanol		2016-06-09			Ascorbic acid
heartwood	60%_EtOH,water	burr-grinding,bead-beating	1965-1995	air-dried,silica	Dulwich	TNE	STE+2%_SDS+6%_PVP+20mM_ascorbic_acid	4	65	14.53	0.0276	0.19	0.19	2x_vol_99%_ethanol		2016-06-09			Ascorbic acid
heartwood	60%_EtOH,water	burr-grinding,bead-beating	1965-1995	air-dried,silica	Dulwich	TNE	STE+2%_SDS+6%_PVP+40mM_ascorbic_acid	4	65	16.29	0.0228	0.14	0.14	2x_vol_99%_ethanol		2016-06-09			Ascorbic acid
heartwood	60%_EtOH,water	burr-grinding,bead-beating	1965-1995	air-dried,silica	Dulwich	TNE	STE+2%_SDS+6%_PVP+20mM_ascorbic_acid	4	65	15.56	0.014	0.09	0.09	2x_vol_99%_ethanol		2016-06-09			Ascorbic acid
sapwood	5%_bleach,60%_EtOH,water	burr-grinding,bead-beating	2005-2014	air-dried,silica	Dulwich	TNE	STE+2%_SDS+6%_PVP	4	65	25.84	4.16	16.1	16.1	2x_vol_99%_ethanol		2016-06-09			unknown
sapwood	5%_bleach,60%_EtOH,water	burr-grinding,bead-beating	2005-2014	air-dried,silica	Dulwich	TNE	STE+2%_SDS+6%_PVP	4	65	32.46	4.56	14.05	14.05	2x_vol_99%_ethanol		2016-06-09			unknown
sapwood	5%_bleach,60%_EtOH,water	burr-grinding,bead-beating	2005-2014	air-dried,silica	Dulwich	TNE	STE+2%_SDS+6%_PVP	4	65	22.72	2.86	12.59	12.59	2x_vol_99%_ethanol		2016-06-09			unknown
sapwood	5%_bleach,60%_EtOH,water	burr-grinding,bead-beating	2005-2014	air-dried,silica	Dulwich	TNE	STE+2%_SDS+6%_PVP	4	65	29.7	0.8	2.6936	2.6936	2x_vol_99%_ethanol		2016-07-04			First core segment
sapwood	5%_bleach,60%_EtOH,water	burr-grinding,bead-beating	2005-2014	air-dried,silica	Dulwich	TNE	STE+2%_SDS+6%_PVP	4	65	32	2.34	7.3125	7.3125	2x_vol_99%_ethanol		2016-07-04			First core segment
sapwood	5%_bleach,60%_EtOH,water	burr-grinding,bead-beating	2005-2014	air-dried,silica	Dulwich	TNE	STE+2%_SDS+6%_PVP	4	65	27.4	2.82	10.292	10.292	2x_vol_99%_ethanol		2016-07-04			First core segment
heartwood	5%_bleach,60%_EtOH,water	burr-grinding,bead-beating	1952-1962	air-dried,silica	GLOR03	TNE	STE+2%_SDS+6%_PVP	4	65	23.6	0.0504	0.21	0.21	2x_vol_99%_ethanol		2016-07-04			First core segment
heartwood	5%_bleach,60%_EtOH,water	burr-grinding,bead-beating	1952-1962	air-dried,silica	GLOR03	TNE	STE+2%_SDS+6%_PVP	4	65	24	0.0966	0.4	0.4	2x_vol_99%_ethanol		2016-07-04			First core segment
heartwood	5%_bleach,60%_EtOH,water	burr-grinding,bead-beating	1952-1962	air-dried,silica	GLOR03	TNE	STE+2%_SDS+6%_PVP	4	65	25.2	0.075	0.3	0.3	2x_vol_99%_ethanol		2016-07-04			First core segment
heartwood	60%_EtOH,water	burr-grinding,bead-beating	1965-1995	air-dried,silica	Dulwich	TNE	STE+0.2%_SDS+6%_PVP	4	65	51.7	0.11	0.21	0.21	2x_vol_99%_ethanol		2016-09-02			Lysis buffer
heartwood	60%_EtOH,water	burr-grinding,bead-beating	1965-1995	air-dried,silica	Dulwich	TNE	STE+2%_SDS+6%_PVP	4	65	37	0.0656	0.177297	0.35	2x_vol_99%_ethanol		2016-09-02			Lysis buffer
heartwood	60%_EtOH,water	burr-grinding,bead-beating	1965-1995	air-dried,silica	Dulwich	TNE	STE+2%_SDS+6%_PVP	4	65	36.7	0.0486	0.132425	0.26	2x_vol_99%_ethanol		2016-09-02			Lysis buffer
heartwood	60%_EtOH,water	burr-grinding,bead-beating	1965-1995	air-dried,silica	Dulwich	TNE	STE+2%_SDS+6%_PVP	4	65	39.6	0.0708	0.178788	0.3	2x_vol_99%_ethanol		2016-09-02			Lysis buffer
heartwood	60%_EtOH,water	burr-grinding,bead-beating	1965-1995	air-dried,silica	Dulwich	TNE	STE+0.2%_SDS+6%_PVP	4	65	34.6	0.084	0.242775	0.32	2x_vol_99%_ethanol		2016-09-02			Lysis buffer
heartwood	60%_EtOH,water	burr-grinding,bead-beating	1965-1995	air-dried,silica	Dulwich	TNE	STE+0.2%_SDS+6%_PVP	4	65	40.1	0.146	0.36409	0.46	2x_vol_99%_ethanol		2016-09-02			Lysis buffer
sapwood	5%_bleach,60%_EtOH,water	burr-grinding,bead-beating	2005-2014	air-dried,silica	Dulwich	TNE	STE+0.2%_SDS+6%_PVP	4	65	31.2	0.69	2.2115	2.2115	2x_vol_99%_ethanol		2016-09-02			Lysis buffer
sapwood	5%_bleach,60%_EtOH,water	burr-grinding,bead-beating	2005-2014	air-dried,silica	Dulwich	TNE	STE+0.2%_SDS+6%_PVP	4	65	44.3	2.26	5.1016	5.1016	2x_vol_99%_ethanol		2016-09-02			Lysis buffer
sapwood	5%_bleach,60%_EtOH,water	burr-grinding,bead-beating	2005-2014	air-dried,silica	Dulwich	TNE	STE+0.2%_SDS+6%_PVP	4	65	45.2	1.78	3.9381	3.9381	2x_vol_99%_ethanol		2016-09-02			Lysis buffer
heartwood	5%_bleach,60%_EtOH,water	burr-grinding,bead-beating	1952-1962	air-dried,silica	GLOR03	TNE	STE+2%_SDS+6%_PVP	4	65	36.5	0.127	0.347945	0.63	2x_vol_99%_ethanol		2016-09-02			Lysis buffer
heartwood	5%_bleach,60%_EtOH,water	burr-grinding,bead-beating	1952-1962	air-dried,silica	GLOR03	TNE	STE+2%_SDS+6%_PVP	4	65	31.6	0.0964	0.305063	0.54	2x_vol_99%_ethanol		2016-09-02			Lysis buffer
heartwood	5%_bleach,60%_EtOH,water	burr-grinding,bead-beating	1952-1962	air-dried,silica	GLOR03	TNE	STE+0.2%_SDS+6%_PVP	4	65	39.8	0.0824	0.207035	0.36	2x_vol_99%_ethanol		2016-09-02			Lysis buffer
heartwood	5%_bleach,60%_EtOH,water	burr-grinding,bead-beating	1952-1962	air-dried,silica	GLOR03	TNE	STE+2%_SDS+6%_PVP	4	65	29	0.0792	0.273103	0.47	2x_vol_99%_ethanol		2016-09-02			Lysis buffer
heartwood	5%_bleach,60%_EtOH,water	burr-grinding,bead-beating	1952-1962	air-dried,silica	GLOR03	TNE	STE+0.2%_SDS+6%_PVP	4	65	36.7	0.0366	0.0997275	0.16	2x_vol_99%_ethanol		2016-09-02			Lysis buffer
heartwood	5%_bleach,60%_EtOH,water	burr-grinding,bead-beating	1952-1962	air-dried,silica	GLOR03	TNE	STE+0.2%_SDS+6%_PVP	4	65	39.5	0.121	0.306329	0.4	2x_vol_99%_ethanol		2016-09-02			Lysis buffer
sapwood	5%_bleach,60%_EtOH,water	burr-grinding,bead-beating	2005-2014	air-dried,silica	Dulwich	TNE	aDNA_no_DTT	4	65	33.3	0.88	2.6426	2.6426	2x_vol_99%_ethanol		2016-09-12			Lysis buffer
sapwood	5%_bleach,60%_EtOH,water	burr-grinding,bead-beating	2005-2014	air-dried,silica	Dulwich	TNE	aDNA_no_DTT	4	65	39.1	0.626	1.601	1.601	2x_vol_99%_ethanol		2016-09-12			Lysis buffer
sapwood	5%_bleach,60%_EtOH,water	burr-grinding,bead-beating	2005-2014	air-dried,silica	Dulwich	TNE	aDNA_no_DTT	4	65	41	0.52	1.2683	1.2683	2x_vol_99%_ethanol		2016-09-12			Lysis buffer
sapwood	5%_bleach,60%_EtOH,water	burr-grinding,bead-beating	2005-2014	air-dried,silica	Dulwich	TNE	aDNA_no_DTT	4	65	28.3	0.934	3.3004	3.3004	2x_vol_99%_ethanol		2016-09-12			Lysis buffer
sapwood	5%_bleach,60%_EtOH,water	burr-grinding,bead-beating	2005-2014	air-dried,silica	Dulwich	TNE	aDNA_no_DTT	4	65	37.4	0.738	1.9733	1.9733	2x_vol_99%_ethanol		2016-09-12			Lysis buffer
sapwood	5%_bleach,60%_EtOH,water	burr-grinding,bead-beating	2005-2014	air-dried,silica	Dulwich	TNE	aDNA_no_DTT	4	65	38	0.67	1.7632	1.7632	2x_vol_99%_ethanol		2016-09-12			Lysis buffer
heartwood	60%_EtOH,water	burr-grinding,bead-beating	1965-1995	air-dried,silica	Dulwich	TNE	PTB	4	65	34.7	0.112	0.322767	0.38	2x_vol_99%_ethanol		2016-09-14			Lysis buffer
heartwood	60%_EtOH,water	burr-grinding,bead-beating	1965-1995	air-dried,silica	Dulwich	TNE	PTB	4	65	28.2	0.083	0.294326	0.34	2x_vol_99%_ethanol		2016-09-14			Lysis buffer
heartwood	60%_EtOH,water	burr-grinding,bead-beating	1965-1995	air-dried,silica	Dulwich	TNE	PTB	4	65	33.5	0.115	0.343284	0.39	2x_vol_99%_ethanol		2016-09-14			Lysis buffer
sapwood	5%_bleach,60%_EtOH,water	burr-grinding,bead-beating	2005-2014	air-dried,silica	Dulwich	TNE	PTB	4	65	35.5	0.322	0.907	0.907	2x_vol_99%_ethanol		2016-09-14			Lysis buffer
sapwood	5%_bleach,60%_EtOH,water	burr-grinding,bead-beating	2005-2014	air-dried,silica	Dulwich	TNE	PTB	4	65	33.1	0.388	1.1722	1.1722	2x_vol_99%_ethanol		2016-09-14			Lysis buffer
sapwood	5%_bleach,60%_EtOH,water	burr-grinding,bead-beating	2005-2014	air-dried,silica	Dulwich	TNE	PTB	4	65	38.9	0.57	1.4653	1.4653	2x_vol_99%_ethanol		2016-09-14			Lysis buffer
heartwood	5%_bleach,60%_EtOH,water	burr-grinding,bead-beating	1952-1962	air-dried,silica	GLOR03	TNE	PTB	4	65	28.5	0.047	0.1649	0.1649	2x_vol_99%_ethanol		2016-09-14			Lysis buffer
heartwood	5%_bleach,60%_EtOH,water	burr-grinding,bead-beating	1952-1962	air-dried,silica	GLOR03	TNE	PTB	4	65	22.2	0.0382	0.172072	0.23	2x_vol_99%_ethanol		2016-09-14			Lysis buffer
heartwood	5%_bleach,60%_EtOH,water	burr-grinding,bead-beating	1952-1962	air-dried,silica	GLOR03	TNE	PTB	4	65	24.2	0.0418	0.172727	0.2	2x_vol_99%_ethanol		2016-09-14			Lysis buffer
heartwood	60%_EtOH,water	burr-grinding,bead-beating	1965-1995	air-dried,silica	Dulwich	TNE	aDNA	4	65	30.3	0.0984	0.32	0.32	2x_vol_99%_ethanol		2016-09-20			Lysis buffer
heartwood	60%_EtOH,water	burr-grinding,bead-beating	1965-1995	air-dried,silica	Dulwich	TNE	aDNA	4	65	23.1	0.0874	0.378355	0.42	2x_vol_99%_ethanol		2016-09-20			Lysis buffer
heartwood	60%_EtOH,water	burr-grinding,bead-beating	1965-1995	air-dried,silica	Dulwich	TNE	aDNA	4	65	21.6	0.0882	0.408333	0.44	2x_vol_99%_ethanol		2016-09-20			Lysis buffer
sapwood	5%_bleach,60%_EtOH,water	burr-grinding,bead-beating	2005-2014	air-dried,silica	Dulwich	TNE	aDNA	4	65	30.9	0.34	1.1003	1.1003	2x_vol_99%_ethanol		2016-09-20			Lysis buffer
sapwood	5%_bleach,60%_EtOH,water	burr-grinding,bead-beating	2005-2014	air-dried,silica	Dulwich	TNE	aDNA	4	65	25.8	0.472	1.8295	1.8295	2x_vol_99%_ethanol		2016-09-20			Lysis buffer
sapwood	5%_bleach,60%_EtOH,water	burr-grinding,bead-beating	2005-2014	air-dried,silica	Dulwich	TNE	aDNA	4	65	22.5	0.35	1.5556	1.5556	2x_vol_99%_ethanol		2016-09-20			Lysis buffer
heartwood	5%_bleach,60%_EtOH,water	burr-grinding,bead-beating	1952-1962	air-dried,silica	GLOR03	TNE	aDNA	4	65	18.1	0.0404	0.2232	0.2232	2x_vol_99%_ethanol		2016-09-20			Lysis buffer
heartwood	5%_bleach,60%_EtOH,water	burr-grinding,bead-beating	1952-1962	air-dried,silica	GLOR03	TNE	aDNA	4	65	28.2	0.0626	0.222	0.222	2x_vol_99%_ethanol		2016-09-20			Lysis buffer
heartwood	5%_bleach,60%_EtOH,water	burr-grinding,bead-beating	1952-1962	air-dried,silica	GLOR03	TNE	aDNA	4	65	23.1	0.0458	0.1983	0.1983	2x_vol_99%_ethanol		2016-09-20			Lysis buffer
heartwood	60%_EtOH,water	burr-grinding,bead-beating	1965-1995	air-dried,silica	Dulwich	TNE	aDNA_no_DTT	4	65	43.6	0.278	0.637615	0.97	2x_vol_99%_ethanol		2016-10-07			Lysis buffer
heartwood	60%_EtOH,water	burr-grinding,bead-beating	1965-1995	air-dried,silica	Dulwich	TNE	aDNA_no_DTT	4	65	40.7	0.236	0.579853	0.82	2x_vol_99%_ethanol		2016-10-07			Lysis buffer
heartwood	60%_EtOH,water	burr-grinding,bead-beating	1965-1995	air-dried,silica	Dulwich	TNE	aDNA_no_DTT	4	65	39.1	0.286	0.731458	1.01	2x_vol_99%_ethanol		2016-10-07			Lysis buffer
heartwood	60%_EtOH,water	burr-grinding,bead-beating	1965-1995	air-dried,silica	Dulwich	TNE	aDNA_no_DTT	4	65	20.5	0.13	0.634146	0.79	2x_vol_99%_ethanol		2016-10-07			Lysis buffer
heartwood	60%_EtOH,water	burr-grinding,bead-beating	1965-1995	air-dried,silica	Dulwich	TNE	aDNA_no_DTT	4	65	28.2	0.196	0.695035	0.86	2x_vol_99%_ethanol		2016-10-07			Lysis buffer
heartwood	60%_EtOH,water	burr-grinding,bead-beating	1965-1995	air-dried,silica	Dulwich	TNE	aDNA_no_DTT	4	65	30.1	0.222	0.737542	0.91	2x_vol_99%_ethanol		2016-10-07			Lysis buffer
heartwood	5%_bleach,60%_EtOH,water	burr-grinding,bead-beating	1952-1962	air-dried,silica	GLOR03	TNE	aDNA_no_DTT	4	65	23.8	0.21	0.882353	1.5	2x_vol_99%_ethanol		2016-10-07			Lysis buffer
heartwood	5%_bleach,60%_EtOH,water	burr-grinding,bead-beating	1952-1962	air-dried,silica	GLOR03	TNE	aDNA_no_DTT	4	65	30.5	0.24	0.786885	1.19	2x_vol_99%_ethanol		2016-10-07			Lysis buffer
heartwood	5%_bleach,60%_EtOH,water	burr-grinding,bead-beating	1952-1962	air-dried,silica	GLOR03	TNE	aDNA_no_DTT	4	65	25	0.258	1.032	1.52	2x_vol_99%_ethanol		2016-10-07			Lysis buffer
heartwood	5%_bleach,60%_EtOH,water	burr-grinding,bead-beating	1952-1962	air-dried,silica	GLOR03	TNE	aDNA_no_DTT	4	65	25.7	0.204	0.793774	1.04	2x_vol_99%_ethanol		2016-10-07			Lysis buffer
heartwood	5%_bleach,60%_EtOH,water	burr-grinding,bead-beating	1952-1962	air-dried,silica	GLOR03	TNE	aDNA_no_DTT	4	65	30.9	0.25	0.809061	1.03	2x_vol_99%_ethanol		2016-10-07			Lysis buffer
heartwood	5%_bleach,60%_EtOH,water	burr-grinding,bead-beating	1952-1962	air-dried,silica	GLOR03	TNE	aDNA_no_DTT	4	65	20.1	0.18	0.895522	1.11	2x_vol_99%_ethanol		2016-10-07			Lysis buffer
heartwood	60%_EtOH,water	burr-grinding,bead-beating	1965-1995	air-dried,silica	Dulwich	TNE	STE+2%_SDS+6%_PVP	4	65	36.7	0.033	0.0899	0.0899	2x_vol_99%_ethanol	failure	2016-10-17			First library prep; Temperature	Contaminated neg ctrl
heartwood	60%_EtOH,water	burr-grinding,bead-beating	1965-1995	air-dried,silica	Dulwich	TNE	STE+2%_SDS+6%_PVP	4	65	24	0.021	0.0875	0.0875	2x_vol_99%_ethanol	failure	2016-10-17			First library prep; Temperature	Contaminated neg ctrl
heartwood	60%_EtOH,water	burr-grinding,bead-beating	1965-1995	air-dried,silica	Dulwich	TNE	STE+2%_SDS+6%_PVP	4	65	34	0.046	0.1353	0.1353	2x_vol_99%_ethanol	failure	2016-10-17			First library prep; Temperature	Contaminated neg ctrl
sapwood	5%_bleach,60%_EtOH,water	burr-grinding,bead-beating	2005-2014	air-dried,silica	Dulwich	TNE	STE+2%_SDS+6%_PVP	4	65	25.4	2.7	10.6299	10.6299	2x_vol_99%_ethanol		2016-10-17			First library prep; Temperature	Contaminated neg ctrl
sapwood	5%_bleach,60%_EtOH,water	burr-grinding,bead-beating	2005-2014	air-dried,silica	Dulwich	TNE	STE+2%_SDS+6%_PVP	4	65	33.6	1.68	5	5	2x_vol_99%_ethanol	success	2016-10-17			First library prep; Temperature	Contaminated neg ctrl
sapwood	5%_bleach,60%_EtOH,water	burr-grinding,bead-beating	2005-2014	air-dried,silica	Dulwich	TNE	STE+2%_SDS+6%_PVP	4	65	21.6	0.83	3.8426	3.8426	2x_vol_99%_ethanol	success	2016-10-17			First library prep; Temperature	Contaminated neg ctrl
heartwood	60%_EtOH,water	burr-grinding,bead-beating	1965-1995	air-dried,silica	Dulwich	TNE,MetOH+CaCl2+DTT	STE+2%_SDS+6%_PVP	4	4	34.1	0.0412	0.1208	0.1208	2x_vol_99%_ethanol		2016-10-28			TNE vs methanol @4C
heartwood	60%_EtOH,water	burr-grinding,bead-beating	1965-1995	air-dried,silica	Dulwich	TNE	STE+2%_SDS+6%_PVP	4	65	27.6	0.062	0.2246	0.2246	2x_vol_99%_ethanol		2016-10-28			Temperature
heartwood	60%_EtOH,water	burr-grinding,bead-beating	1965-1995	air-dried,silica	Dulwich	TNE	STE+2%_SDS+6%_PVP	4	65	31.6	0.067	0.212	0.212	2x_vol_99%_ethanol		2016-10-28			Temperature
heartwood	60%_EtOH,water	burr-grinding,bead-beating	1965-1995	air-dried,silica	Dulwich	TNE,MetOH+CaCl2+DTT	STE+2%_SDS+6%_PVP	4	4	25.5	0.0394	0.1545	0.1545	2x_vol_99%_ethanol		2016-10-28			TNE vs methanol @4C
heartwood	60%_EtOH,water	burr-grinding,bead-beating	1965-1995	air-dried,silica	Dulwich	TNE	STE+2%_SDS+6%_PVP	4	65	30.1	0.053	0.1761	0.1761	2x_vol_99%_ethanol		2016-10-28			Temperature
heartwood	60%_EtOH,water	burr-grinding,bead-beating	1965-1995	air-dried,silica	Dulwich	TNE,MetOH+CaCl2+DTT	STE+2%_SDS+6%_PVP	4	4	26.6	0.0346	0.1301	0.1301	2x_vol_99%_ethanol		2016-10-28			TNE vs methanol @4C
sapwood	5%_bleach,60%_EtOH,water	burr-grinding,bead-beating	2005-2014	air-dried,silica	Dulwich	TNE	STE+2%_SDS+6%_PVP	4	65	23.5	1.84	7.8298	7.8298	2x_vol_99%_ethanol		2016-10-28			TNE vs methanol @65C; Temperature
sapwood	5%_bleach,60%_EtOH,water	burr-grinding,bead-beating	2005-2014	air-dried,silica	Dulwich	TNE,MetOH+CaCl2+DTT	STE+2%_SDS+6%_PVP	4	65	25.8	0.83	3.2171	3.2171	2x_vol_99%_ethanol		2016-10-28			TNE vs methanol @65C; Temperature
heartwood	60%_EtOH,water	burr-grinding,bead-beating	1965-1995	air-dried,silica	Dulwich	TNE	STE+2%_SDS+6%_PVP	4	4	40.4	0.071	0.1757	0.1757	2x_vol_99%_ethanol		2016-11-15			TNE vs methanol @4C; Temperature
heartwood	60%_EtOH,water	burr-grinding,bead-beating	1965-1995	air-dried,silica	Dulwich	MetOH+CaCl2+DTT	STE+2%_SDS+6%_PVP	4	4	24.5	0.027	0.1102	0.1102	2x_vol_99%_ethanol		2016-11-15			TNE vs methanol @4C
heartwood	60%_EtOH,water	burr-grinding,bead-beating	1965-1995	air-dried,silica	Dulwich	TNE	STE+2%_SDS+6%_PVP	4	4	24.5	0.0438	0.1788	0.1788	2x_vol_99%_ethanol		2016-11-15			TNE vs methanol @4C; Temperature
heartwood	60%_EtOH,water	burr-grinding,bead-beating	1965-1995	air-dried,silica	Dulwich	MetOH+CaCl2+DTT	STE+2%_SDS+6%_PVP	4	4	29.8	0.0426	0.143	0.143	2x_vol_99%_ethanol		2016-11-15			TNE vs methanol @4C
heartwood	60%_EtOH,water	burr-grinding,bead-beating	1965-1995	air-dried,silica	Dulwich	MetOH+CaCl2+DTT	STE+2%_SDS+6%_PVP	4	4	30.8	0.0278	0.0903	0.0903	2x_vol_99%_ethanol		2016-11-15			TNE vs methanol @4C
sapwood	5%_bleach,60%_EtOH,water	burr-grinding,bead-beating	2005-2014	air-dried,silica	Dulwich	TNE	STE+2%_SDS+6%_PVP	4	4	37.8	1.74	4.6032	4.6032	2x_vol_99%_ethanol		2016-11-15			TNE vs methanol @4C; Temperature
sapwood	5%_bleach,60%_EtOH,water	burr-grinding,bead-beating	2005-2014	air-dried,silica	Dulwich	TNE	STE+2%_SDS+6%_PVP	4	4	49.8	3.12	6.2651	6.2651	2x_vol_99%_ethanol		2016-11-15			TNE vs methanol @4C; Temperature
sapwood	5%_bleach,60%_EtOH,water	burr-grinding,bead-beating	2005-2014	air-dried,silica	Dulwich	MetOH+CaCl2+DTT	STE+2%_SDS+6%_PVP	4	4	45.8	2.28	4.9782	4.9782	2x_vol_99%_ethanol		2016-11-15			TNE vs methanol @4C
sapwood	5%_bleach,60%_EtOH,water	burr-grinding,bead-beating	2005-2014	air-dried,silica	Dulwich	MetOH+CaCl2+DTT	STE+2%_SDS+6%_PVP	4	4	55.3	1.57	2.8391	2.8391	2x_vol_99%_ethanol		2016-11-15			TNE vs methanol @4C
sapwood	5%_bleach,60%_EtOH,water	burr-grinding,bead-beating	2005-2014	air-dried,silica	Dulwich	TNE,MetOH+CaCl2+DTT	STE+2%_SDS+6%_PVP	4	4	48.9	0.394	0.8057	0.8057	2x_vol_99%_ethanol		2016-12-07			Lysis duration
sapwood	5%_bleach,60%_EtOH,water	burr-grinding,bead-beating	2005-2014	air-dried,silica	Dulwich	TNE,MetOH+CaCl2+DTT	STE+2%_SDS+6%_PVP	18	4	60.2	0.78	1.2957	1.2957	2x_vol_99%_ethanol		2016-12-07			Lysis duration
sapwood	5%_bleach,60%_EtOH,water	burr-grinding,bead-beating	2005-2014	air-dried,silica	Dulwich	TNE,MetOH+CaCl2+DTT	STE+2%_SDS+6%_PVP	24	4	51.3	0.312	0.6082	0.6082	2x_vol_99%_ethanol		2016-12-07			Lysis duration
heartwood	5%_bleach,60%_EtOH,water	burr-grinding,bead-beating	1952-1962	air-dried,silica	GLOR03	TNE,MetOH+CaCl2+DTT	STE+2%_SDS+6%_PVP	4	4	66.6	0.21	0.31	0.31	2x_vol_99%_ethanol		2016-12-07			Lysis duration
heartwood	5%_bleach,60%_EtOH,water	burr-grinding,bead-beating	1952-1962	air-dried,silica	GLOR03	TNE,MetOH+CaCl2+DTT	STE+2%_SDS+6%_PVP	24	4	63.6	0.135	0.21	0.21	2x_vol_99%_ethanol		2016-12-07			Lysis duration
heartwood	5%_bleach,60%_EtOH,water	burr-grinding,bead-beating	1952-1962	air-dried,silica	GLOR03	TNE,MetOH+CaCl2+DTT	STE+2%_SDS+6%_PVP	18	4	77.4	0.226	0.29	0.29	2x_vol_99%_ethanol		2016-12-07			Lysis duration
heartwood	5%_bleach,60%_EtOH,water	burr-grinding,bead-beating	1952-1962	air-dried,silica	GLOR03	TNE,MetOH+CaCl2+DTT	STE+2%_SDS+6%_PVP	4	4	48.2	0.164	0.34	0.34	2x_vol_99%_ethanol		2016-12-07			Lysis duration
heartwood	5%_bleach,60%_EtOH,water	burr-grinding,bead-beating	1952-1962	air-dried,silica	GLOR03	TNE,MetOH+CaCl2+DTT	STE+2%_SDS+6%_PVP	4	4	73	0.218	0.3	0.3	2x_vol_99%_ethanol		2016-12-07			Lysis duration
heartwood	5%_bleach,60%_EtOH,water	burr-grinding,bead-beating	1952-1962	air-dried,silica	GLOR03	TNE,MetOH+CaCl2+DTT	STE+2%_SDS+6%_PVP	24	4	88.5	0.246	0.28	0.28	2x_vol_99%_ethanol		2016-12-07			Lysis duration
heartwood	5%_bleach,60%_EtOH,water	burr-grinding,bead-beating	1952-1962	air-dried,silica	GLOR03	TNE,MetOH+CaCl2+DTT	STE+2%_SDS+6%_PVP	18	4	64.2	0.172	0.27	0.27	2x_vol_99%_ethanol		2016-12-07			Lysis duration
heartwood	5%_bleach,60%_EtOH,water	burr-grinding,bead-beating	1952-1962	air-dried,silica	GLOR03	TNE,MetOH+CaCl2+DTT	STE+2%_SDS+6%_PVP	24	4	63.3	0.188	0.3	0.3	2x_vol_99%_ethanol		2016-12-07			Lysis duration
heartwood	5%_bleach,60%_EtOH,water	burr-grinding,bead-beating	1952-1962	air-dried,silica	GLOR03	TNE,MetOH+CaCl2+DTT	STE+2%_SDS+6%_PVP	18	4	70.1	0.208	0.3	0.3	2x_vol_99%_ethanol		2016-12-07			Lysis duration
heartwood	5%_bleach,60%_EtOH,water	burr-grinding,bead-beating	1962-1972	air-dried,silica	GLOR03	TNE,MetOH+CaCl2+DTT	STE+2%_SDS+6%_PVP	4	4	71.1	0.0398	0.056	0.056	2x_vol_99%_ethanol	success	2017-01-04			GLOR03 1900s segments
heartwood	5%_bleach,60%_EtOH,water	burr-grinding,bead-beating	1962-1972	air-dried,silica	GLOR03	TNE,MetOH+CaCl2+DTT	STE+2%_SDS+6%_PVP	4	4	50.5	0.0318	0.063	0.063	2x_vol_99%_ethanol	success	2017-01-04			GLOR03 1900s segments
heartwood	5%_bleach,60%_EtOH,water	burr-grinding,bead-beating	1962-1972	air-dried,silica	GLOR03	TNE,MetOH+CaCl2+DTT	STE+2%_SDS+6%_PVP	4	4	59.2	0.0396	0.067	0.067	2x_vol_99%_ethanol	success	2017-01-04			GLOR03 1900s segments
sapwood	5%_bleach,60%_EtOH,water	burr-grinding,bead-beating	1983-2013	air-dried,silica	GLOR03	TNE,MetOH+CaCl2+DTT	STE+2%_SDS+6%_PVP	4	4	51.6	0.11	0.21	0.21	2x_vol_99%_ethanol	success	2017-01-04			GLOR03 1900s segments
sapwood	5%_bleach,60%_EtOH,water	burr-grinding,bead-beating	1983-2013	air-dried,silica	GLOR03	TNE,MetOH+CaCl2+DTT	STE+2%_SDS+6%_PVP	4	4	43.8	0.0556	0.1269	0.1269	2x_vol_99%_ethanol	success	2017-01-04			GLOR03 1900s segments
sapwood	5%_bleach,60%_EtOH,water	burr-grinding,bead-beating	1983-2013	air-dried,silica	GLOR03	TNE,MetOH+CaCl2+DTT	STE+2%_SDS+6%_PVP	4	4	52.4	0.09	0.1718	0.1718	2x_vol_99%_ethanol	success	2017-01-04			GLOR03 1900s segments
heartwood	5%_bleach,60%_EtOH,water	burr-grinding,bead-beating	1932-1942	air-dried,silica	GLOR03	TNE,MetOH+CaCl2+DTT	STE+2%_SDS+6%_PVP	4	4	55.8	0.057	0.1	0.1	2x_vol_99%_ethanol	failure	2017-01-16			GLOR03 1900s segments
heartwood	5%_bleach,60%_EtOH,water	burr-grinding,bead-beating	1932-1942	air-dried,silica	GLOR03	TNE,MetOH+CaCl2+DTT	STE+2%_SDS+6%_PVP	4	4	60.6	0.0462	0.0762	0.0762	2x_vol_99%_ethanol	failure	2017-01-16			GLOR03 1900s segments
heartwood	5%_bleach,60%_EtOH,water	burr-grinding,bead-beating	1932-1942	air-dried,silica	GLOR03	TNE,MetOH+CaCl2+DTT	STE+2%_SDS+6%_PVP	4	4	48.5	0.0564	0.12	0.12	2x_vol_99%_ethanol	failure	2017-01-16			GLOR03 1900s segments
sapwood	5%_bleach,60%_EtOH,water	burr-grinding,bead-beating	1983-2013	air-dried,silica	GLOR03	TNE,MetOH+CaCl2+DTT	STE+2%_SDS+6%_PVP	4	4	43.8	0.151	0.3447	0.3447	2x_vol_99%_ethanol	success	2017-01-16			GLOR03 1900s segments
sapwood	5%_bleach,60%_EtOH,water	burr-grinding,bead-beating	1983-2013	air-dried,silica	GLOR03	TNE,MetOH+CaCl2+DTT	STE+2%_SDS+6%_PVP	4	4	62.9	0.158	0.2512	0.2512	2x_vol_99%_ethanol	success	2017-01-16			GLOR03 1900s segments
sapwood	5%_bleach,60%_EtOH,water	burr-grinding,bead-beating	1983-2013	air-dried,silica	GLOR03	TNE,MetOH+CaCl2+DTT	STE+2%_SDS+6%_PVP	4	4	43.4	0.118	0.2719	0.2719	2x_vol_99%_ethanol	success	2017-01-16			GLOR03 1900s segments
heartwood	5%_bleach,60%_EtOH,water	burr-grinding,bead-beating	1932-1942	air-dried,silica	GLOR03	TNE,MetOH+CaCl2+DTT	STE+2%_SDS+6%_PVP	4	4	55	0.066	0.12	0.12	2x_vol_99%_ethanol	failure	2017-01-27			GLOR03 1900s segments
heartwood	5%_bleach,60%_EtOH,water	burr-grinding,bead-beating	1932-1942	air-dried,silica	GLOR03	TNE,MetOH+CaCl2+DTT	STE+2%_SDS+6%_PVP	4	4	53.2	0.0388	0.073	0.073	2x_vol_99%_ethanol	failure	2017-01-27			GLOR03 1900s segments
heartwood	5%_bleach,60%_EtOH,water	burr-grinding,bead-beating	1932-1942	air-dried,silica	GLOR03	TNE,MetOH+CaCl2+DTT	STE+2%_SDS+6%_PVP	4	4	53	0.0524	0.1	0.1	2x_vol_99%_ethanol	failure	2017-01-27			GLOR03 1900s segments
heartwood	5%_bleach,60%_EtOH,water	burr-grinding,bead-beating	1972-1977	air-dried,silica	GLOR03	TNE,MetOH+CaCl2+DTT	STE+2%_SDS+6%_PVP	4	4	48.7	0.0376	0.07	0.07	2x_vol_99%_ethanol	failure	2017-01-27			GLOR03 1900s segments
heartwood	5%_bleach,60%_EtOH,water	burr-grinding,bead-beating	1972-1977	air-dried,silica	GLOR03	TNE,MetOH+CaCl2+DTT	STE+2%_SDS+6%_PVP	4	4	47.5	0.0482	0.1	0.1	2x_vol_99%_ethanol	failure	2017-01-27			GLOR03 1900s segments
sapwood	5%_bleach,60%_EtOH,water	burr-grinding,bead-beating	1983-2013	air-dried,silica	GLOR03	TNE,MetOH+CaCl2+DTT	STE+2%_SDS+6%_PVP	4	4	47.7	0.0824	0.1727	0.1727	2x_vol_99%_ethanol	success	2017-01-27			GLOR03 1900s segments
sapwood	5%_bleach,60%_EtOH,water	burr-grinding,bead-beating	1983-2013	air-dried,silica	GLOR03	TNE,MetOH+CaCl2+DTT	STE+2%_SDS+6%_PVP	4	4	54.8	0.082	0.1496	0.1496	2x_vol_99%_ethanol	success	2017-01-27			GLOR03 1900s segments
sapwood	5%_bleach,60%_EtOH,water	burr-grinding,bead-beating	1983-2013	air-dried,silica	GLOR03	TNE,MetOH+CaCl2+DTT	STE+2%_SDS+6%_PVP	4	4	51.5	0.109	0.2117	0.2117	2x_vol_99%_ethanol	success	2017-01-27			GLOR03 1900s segments
heartwood	5%_bleach,60%_EtOH,water	burr-grinding,bead-beating	1954-1963	air-dried,silica	GLOR07	TNE,MetOH+CaCl2+DTT	STE+2%_SDS+6%_PVP	4	4	76.2	0.0814	0.1068	0.1068	2x_vol_99%_ethanol	success	2017-02-16			GLOR07 1900s segments v1
heartwood	5%_bleach,60%_EtOH,water	burr-grinding,bead-beating	1954-1963	air-dried,silica	GLOR07	TNE,MetOH+CaCl2+DTT	STE+2%_SDS+6%_PVP	4	4	58.4	0.0514	0.088	0.088	2x_vol_99%_ethanol	success	2017-02-16			GLOR07 1900s segments v1
heartwood	5%_bleach,60%_EtOH,water	burr-grinding,bead-beating	1954-1963	air-dried,silica	GLOR07	TNE,MetOH+CaCl2+DTT	STE+2%_SDS+6%_PVP	4	4	50	0.0606	0.1212	0.1212	2x_vol_99%_ethanol	success	2017-02-16			GLOR07 1900s segments v1
heartwood	5%_bleach,60%_EtOH,water	burr-grinding,bead-beating	1964-1980	air-dried,silica	GLOR07	TNE,MetOH+CaCl2+DTT	STE+2%_SDS+6%_PVP	4	4	49.6	0.061	0.12	0.12	2x_vol_99%_ethanol	success	2017-02-16			GLOR07 1900s segments v1
heartwood	5%_bleach,60%_EtOH,water	burr-grinding,bead-beating	1964-1980	air-dried,silica	GLOR07	TNE,MetOH+CaCl2+DTT	STE+2%_SDS+6%_PVP	4	4	58.6	0.107	0.18	0.18	2x_vol_99%_ethanol	success	2017-02-16			GLOR07 1900s segments v1
heartwood	5%_bleach,60%_EtOH,water	burr-grinding,bead-beating	1964-1980	air-dried,silica	GLOR07	TNE,MetOH+CaCl2+DTT	STE+2%_SDS+6%_PVP	4	4	71.8	0.0908	0.13	0.13	2x_vol_99%_ethanol	success	2017-02-16			GLOR07 1900s segments v1
sapwood	5%_bleach,60%_EtOH,water	burr-grinding,bead-beating	1990-2014	air-dried,silica	GLOR07	TNE,MetOH+CaCl2+DTT	STE+2%_SDS+6%_PVP	4	4	53.8	0.434	0.8067	0.8067	2x_vol_99%_ethanol	success	2017-02-16			GLOR07 1900s segments v1
sapwood	5%_bleach,60%_EtOH,water	burr-grinding,bead-beating	1990-2014	air-dried,silica	GLOR07	TNE,MetOH+CaCl2+DTT	STE+2%_SDS+6%_PVP	4	4	38.8	0.27	0.6959	0.6959	2x_vol_99%_ethanol	success	2017-02-16			GLOR07 1900s segments v1
sapwood	5%_bleach,60%_EtOH,water	burr-grinding,bead-beating	1990-2014	air-dried,silica	GLOR07	TNE,MetOH+CaCl2+DTT	STE+2%_SDS+6%_PVP	4	4	47.6	0.43	0.9034	0.9034	2x_vol_99%_ethanol	success	2017-02-16			GLOR07 1900s segments v1
heartwood	5%_bleach,60%_EtOH,water	burr-grinding,bead-beating	1934-1943	air-dried,silica	GLOR07	TNE,MetOH+CaCl2+DTT	STE+2%_SDS+6%_PVP	4	4	64.7	0.0604	0.09	0.09	2x_vol_99%_ethanol		2017-04-28			First single-tube prep
heartwood	5%_bleach,60%_EtOH,water	burr-grinding,bead-beating	1934-1943	air-dried,silica	GLOR07	TNE,MetOH+CaCl2+DTT	STE+2%_SDS+6%_PVP	4	4	58.4	0.0724	0.12	0.12	2x_vol_99%_ethanol		2017-04-28			First single-tube prep
heartwood	5%_bleach,60%_EtOH,water	burr-grinding,bead-beating	1934-1943	air-dried,silica	GLOR07	TNE,MetOH+CaCl2+DTT	STE+2%_SDS+6%_PVP	4	4	39.9	0.0402	0.1	0.1	2x_vol_99%_ethanol		2017-04-28			First single-tube prep
heartwood	5%_bleach,60%_EtOH,water	burr-grinding,bead-beating	1944-1953	air-dried,silica	GLOR07	TNE,MetOH+CaCl2+DTT	STE+2%_SDS+6%_PVP	4	4	50.1	0.0568	0.11	0.11	2x_vol_99%_ethanol		2017-04-28		failure	First single-tube prep
heartwood	5%_bleach,60%_EtOH,water	burr-grinding,bead-beating	1944-1953	air-dried,silica	GLOR07	TNE,MetOH+CaCl2+DTT	STE+2%_SDS+6%_PVP	4	4	68.1	0.0834	0.12	0.12	2x_vol_99%_ethanol		2017-04-28			First single-tube prep
heartwood	5%_bleach,60%_EtOH,water	burr-grinding,bead-beating	1944-1953	air-dried,silica	GLOR07	TNE,MetOH+CaCl2+DTT	STE+2%_SDS+6%_PVP	4	4	51.3	0.0548	0.11	0.11	2x_vol_99%_ethanol		2017-04-28		failure	First single-tube prep
sapwood	5%_bleach,60%_EtOH,water	burr-grinding,bead-beating	2005-2014	air-dried,silica	Dulwich	TNE,MetOH+CaCl2+DTT	STE+2%_SDS+6%_PVP	4	4	62.7	0.129	0.2057	0.2057	2x_vol_99%_ethanol		2017-05-18			GLOR02 frozen 1800 segment
sapwood	5%_bleach,60%_EtOH,water	burr-grinding,bead-beating	2005-2014	air-dried,silica	Dulwich	TNE,MetOH+CaCl2+DTT	STE+2%_SDS+6%_PVP	4	4	52.6	0.226	0.4297	0.4297	2x_vol_99%_ethanol	success	2017-05-18			GLOR02 frozen 1800 segment
sapwood	5%_bleach,60%_EtOH,water	burr-grinding,bead-beating	2005-2014	air-dried,silica	Dulwich	TNE,MetOH+CaCl2+DTT	STE+2%_SDS+6%_PVP	4	4	45.6	0.177	0.3882	0.3882	2x_vol_99%_ethanol		2017-05-18			GLOR02 frozen 1800 segment
heartwood	5%_bleach,60%_EtOH,water	burr-grinding,bead-beating	1800-1802	frozen	GLOR02	TNE,MetOH+CaCl2+DTT	STE+2%_SDS+6%_PVP	4	4	58.6	0.0262	0.044	0.044	2x_vol_99%_ethanol	failure	2017-05-18			GLOR02 frozen 1800 segment	Positive control
heartwood	5%_bleach,60%_EtOH,water	burr-grinding,bead-beating	1800-1802	frozen	GLOR02	TNE,MetOH+CaCl2+DTT	STE+2%_SDS+6%_PVP	4	4	56.1	0.0506	0.09	0.09	2x_vol_99%_ethanol	failure	2017-05-18			GLOR02 frozen 1800 segment	Positive control
heartwood	5%_bleach,60%_EtOH,water	burr-grinding,bead-beating	1800-1802	frozen	GLOR02	TNE,MetOH+CaCl2+DTT	STE+2%_SDS+6%_PVP	4	4	51.3	0.0272	0.053	0.053	2x_vol_99%_ethanol	failure	2017-05-18			GLOR02 frozen 1800 segment	Positive control
sapwood	5%_bleach,60%_EtOH,water	burr-grinding,bead-beating	2000-2017	frozen	GLOR02	TNE,MetOH+CaCl2+DTT	STE+2%_SDS+6%_PVP	4	4	66	0.872	1.3212	1.3212	2x_vol_99%_ethanol	success	2017-05-18			GLOR02 frozen 1800 segment	Positive control
sapwood	5%_bleach,60%_EtOH,water	burr-grinding,bead-beating	2000-2017	frozen	GLOR02	TNE,MetOH+CaCl2+DTT	STE+2%_SDS+6%_PVP	4	4	68	0.874	1.2853	1.2853	2x_vol_99%_ethanol	success	2017-05-18			GLOR02 frozen 1800 segment	Positive control
sapwood	5%_bleach,60%_EtOH,water	burr-grinding,bead-beating	2000-2017	frozen	GLOR02	TNE,MetOH+CaCl2+DTT	STE+2%_SDS+6%_PVP	4	4	61.2	0.444	0.7255	0.7255	2x_vol_99%_ethanol	success	2017-05-18			GLOR02 frozen 1800 segment	Positive control
heartwood	5%_bleach,60%_EtOH,water	burr-grinding,bead-beating	1800-1802	frozen	GLOR02	TNE,MetOH+CaCl2+DTT	STE+2%_SDS+6%_PVP	4	4	67.9	0.0114	0.0168	0.0168	2x_vol_99%_ethanol	success	2017-06-03			GLOR02 frozen 1800 segment
heartwood	5%_bleach,60%_EtOH,water	burr-grinding,bead-beating	1800-1802	frozen	GLOR02	TNE,MetOH+CaCl2+DTT	STE+2%_SDS+6%_PVP	4	4	76.5	0.0256	0.0335	0.0335	2x_vol_99%_ethanol	failure	2017-06-03			GLOR02 frozen 1800 segment
heartwood	5%_bleach,60%_EtOH,water	burr-grinding,bead-beating	1809-1814	air-dried,silica	GLOR07	TNE,MetOH+CaCl2+DTT	STE+0.4%_SDS+6%_PVP+5mM_PTB	4	4	87.3	0.0548	0.062	0.062	2x_vol_99%_ethanol	failure	2017-06-03			GLOR07 1800s segments v1
heartwood	5%_bleach,60%_EtOH,water	burr-grinding,bead-beating	1809-1814	air-dried,silica	GLOR07	TNE,MetOH+CaCl2+DTT	STE+0.4%_SDS+6%_PVP+5mM_PTB	4	4	79.5	0.0494	0.062	0.062	2x_vol_99%_ethanol	failure	2017-06-03			GLOR07 1800s segments v1
heartwood	5%_bleach,60%_EtOH,water	burr-grinding,bead-beating	1815-1819	air-dried,silica	GLOR07	TNE,MetOH+CaCl2+DTT	STE+0.4%_SDS+6%_PVP+5mM_PTB	4	4	69.5	0.0614	0.0883	0.0883	2x_vol_99%_ethanol	failure	2017-06-03			GLOR07 1800s segments v1	Positive control
heartwood	5%_bleach,60%_EtOH,water	burr-grinding,bead-beating	1815-1819	air-dried,silica	GLOR07	TNE,MetOH+CaCl2+DTT	STE+0.4%_SDS+6%_PVP+5mM_PTB	4	4	73.7	0.0612	0.083	0.083	2x_vol_99%_ethanol	failure	2017-06-03			GLOR07 1800s segments v1	Positive control
sapwood	5%_bleach,60%_EtOH,water	burr-grinding,bead-beating	1990-2014	air-dried,silica	GLOR07	TNE,MetOH+CaCl2+DTT	STE+0.4%_SDS+6%_PVP+5mM_PTB	4	4	48.4	0.306	0.6322	0.6322	2x_vol_99%_ethanol	success	2017-06-03			GLOR07 1800s segments v1
sapwood	5%_bleach,60%_EtOH,water	burr-grinding,bead-beating	1990-2014	air-dried,silica	GLOR07	TNE,MetOH+CaCl2+DTT	STE+0.4%_SDS+6%_PVP+5mM_PTB	4	4	41	0.256	0.6244	0.6244	2x_vol_99%_ethanol	success	2017-06-03			GLOR07 1800s segments v1
heartwood	5%_bleach,60%_EtOH,water	burr-grinding,bead-beating	1809-1814	air-dried,silica	GLOR07	TNE,MetOH+CaCl2+DTT	STE+2%_SDS+6%_PVP	4	4	161.95	0.225	0.0833	0.0833	2x_vol_99%_ethanol	failure	2017-06-23			GLOR07 1800s segments v2
heartwood	5%_bleach,60%_EtOH,water	burr-grinding,bead-beating	1809-1814	air-dried,silica	GLOR07	TNE,MetOH+CaCl2+DTT	STE+2%_SDS+6%_PVP	4	4	161.95	0.225	0.0833	0.0833	2x_vol_99%_ethanol	failure	2017-06-23			GLOR07 1800s segments v2
heartwood	5%_bleach,60%_EtOH,water	burr-grinding,bead-beating	1809-1814	air-dried,silica	GLOR07	TNE,MetOH+CaCl2+DTT	STE+2%_SDS+6%_PVP	4	4	47	0.0564	0.12	0.12	2x_vol_99%_ethanol	failure	2017-06-23			GLOR07 1800s segments v2
heartwood	5%_bleach,60%_EtOH,water	burr-grinding,bead-beating	1809-1814	air-dried,silica	GLOR07	TNE,MetOH+CaCl2+DTT	STE+2%_SDS+6%_PVP	4	4	55.6	0.0556	0.1	0.1	2x_vol_99%_ethanol	failure	2017-06-23			GLOR07 1800s segments v2
heartwood	5%_bleach,60%_EtOH,water	burr-grinding,bead-beating	1809-1814	air-dried,silica	GLOR07	TNE,MetOH+CaCl2+DTT	STE+2%_SDS+6%_PVP	4	4	58.91	0.0648	0.11	0.11	2x_vol_99%_ethanol	failure	2017-06-23			GLOR07 1800s segments v2
heartwood	5%_bleach,60%_EtOH,water	burr-grinding,bead-beating	1815-1819	air-dried,silica	GLOR07	TNE,MetOH+CaCl2+DTT	STE+2%_SDS+6%_PVP	4	4	157.35	0.228	0.0869	0.0869	2x_vol_99%_ethanol	failure	2017-06-23			GLOR07 1800s segments v2
heartwood	5%_bleach,60%_EtOH,water	burr-grinding,bead-beating	1815-1819	air-dried,silica	GLOR07	TNE,MetOH+CaCl2+DTT	STE+2%_SDS+6%_PVP	4	4	157.35	0.235	0.0896	0.0896	2x_vol_99%_ethanol	failure	2017-06-23			GLOR07 1800s segments v2
heartwood	5%_bleach,60%_EtOH,water	burr-grinding,bead-beating	1815-1819	air-dried,silica	GLOR07	TNE,MetOH+CaCl2+DTT	STE+2%_SDS+6%_PVP	4	4	51.71	0.0724	0.14	0.14	2x_vol_99%_ethanol	failure	2017-06-23			GLOR07 1800s segments v2
heartwood	5%_bleach,60%_EtOH,water	burr-grinding,bead-beating	1815-1819	air-dried,silica	GLOR07	TNE,MetOH+CaCl2+DTT	STE+2%_SDS+6%_PVP	4	4	54.43	0.0762	0.14	0.14	2x_vol_99%_ethanol	failure	2017-06-23			GLOR07 1800s segments v2
heartwood	5%_bleach,60%_EtOH,water	burr-grinding,bead-beating	1815-1819	air-dried,silica	GLOR07	TNE,MetOH+CaCl2+DTT	STE+2%_SDS+6%_PVP	4	4	52.67	0.079	0.15	0.15	2x_vol_99%_ethanol	failure	2017-06-23			GLOR07 1800s segments v2
sapwood	5%_bleach,60%_EtOH,water	burr-grinding,bead-beating	1990-2014	air-dried,silica	GLOR07	TNE,MetOH+CaCl2+DTT	STE+2%_SDS+6%_PVP	4	4	105.3	1.42	1.3485	1.3485	2x_vol_99%_ethanol	failure	2017-06-23			GLOR07 1800s segments v2
sapwood	5%_bleach,60%_EtOH,water	burr-grinding,bead-beating	1990-2014	air-dried,silica	GLOR07	TNE,MetOH+CaCl2+DTT	STE+2%_SDS+6%_PVP	4	4	24.19	0.248	1.0252	1.0252	2x_vol_99%_ethanol	success	2017-06-23			GLOR07 1800s segments v2
heartwood	Surface_removal	burr-grinding,bead-beating	1816-1820	air-dried,silica	GLOR01	TNE,MetOH+CaCl2+DTT	STE+0.4%_SDS+6%_PVP+5mM_PTB	4	4	51.9	0.0338	0.0651	0.0651	2x_vol_99%_ethanol		2017-11-27			GLOR01 1800s segments v1
heartwood	Surface_removal	burr-grinding,bead-beating	1816-1820	air-dried,silica	GLOR01	TNE,MetOH+CaCl2+DTT	STE+0.4%_SDS+6%_PVP+5mM_PTB	4	4	44.5	0.0284	0.0638	0.0638	2x_vol_99%_ethanol	failure	2017-11-27			GLOR01 1800s segments v1
heartwood	Surface_removal	burr-grinding,bead-beating	1816-1820	air-dried,silica	GLOR01	TNE,MetOH+CaCl2+DTT	STE+0.4%_SDS+6%_PVP+5mM_PTB	4	4	49.5	0.03	0.0606	0.0606	2x_vol_99%_ethanol		2017-11-27			GLOR01 1800s segments v1
heartwood	Surface_removal	burr-grinding,bead-beating	1816-1820	air-dried,silica	GLOR01	TNE,MetOH+CaCl2+DTT	STE+0.4%_SDS+6%_PVP+5mM_PTB	4	4	45.5	0.0328	0.0721	0.0721	2x_vol_99%_ethanol		2017-11-27			GLOR01 1800s segments v1
heartwood	Surface_removal	burr-grinding,bead-beating	1816-1820	air-dried,silica	GLOR01	TNE,MetOH+CaCl2+DTT	STE+0.4%_SDS+6%_PVP+5mM_PTB	4	4	43.9	0.0194	0.0442	0.0442	2x_vol_99%_ethanol		2017-11-27			GLOR01 1800s segments v1
heartwood	Surface_removal	burr-grinding,bead-beating	1816-1820	air-dried,silica	GLOR01	TNE,MetOH+CaCl2+DTT	STE+0.4%_SDS+6%_PVP+5mM_PTB	4	4	48.1	0.039	0.0811	0.0811	2x_vol_99%_ethanol	failure	2017-11-27			GLOR01 1800s segments v1
heartwood	Surface_removal	burr-grinding,bead-beating	1816-1820	air-dried,silica	GLOR01	TNE,MetOH+CaCl2+DTT	STE+0.4%_SDS+6%_PVP+5mM_PTB	4	4	46.9	0.0398	0.0849	0.0849	2x_vol_99%_ethanol	failure	2017-11-27			GLOR01 1800s segments v1	Positive control
heartwood	Surface_removal	burr-grinding,bead-beating	1816-1820	air-dried,silica	GLOR01	TNE,MetOH+CaCl2+DTT	STE+0.4%_SDS+6%_PVP+5mM_PTB	4	4	50.4	0.028	0.0556	0.0556	2x_vol_99%_ethanol		2017-11-27			GLOR01 1800s segments v1	Positive control
heartwood	Surface_removal	burr-grinding,bead-beating	1821-1830	air-dried,silica	GLOR01	TNE,MetOH+CaCl2+DTT	STE+0.4%_SDS+6%_PVP+5mM_PTB	4	4	65.5	0.039	0.0595	0.0595	2x_vol_99%_ethanol		2017-11-27			GLOR01 1800s segments v1	Positive control
heartwood	Surface_removal	burr-grinding,bead-beating	1821-1830	air-dried,silica	GLOR01	TNE,MetOH+CaCl2+DTT	STE+0.4%_SDS+6%_PVP+5mM_PTB	4	4	55.1	0.028	0.0508	0.0508	2x_vol_99%_ethanol	failure	2017-11-27			GLOR01 1800s segments v1	Positive control
heartwood	Surface_removal	burr-grinding,bead-beating	1821-1830	air-dried,silica	GLOR01	TNE,MetOH+CaCl2+DTT	STE+0.4%_SDS+6%_PVP+5mM_PTB	4	4	52.9	0.0336	0.0635	0.0635	2x_vol_99%_ethanol	failure	2017-11-27			GLOR01 1800s segments v1	Positive control
heartwood	Surface_removal	burr-grinding,bead-beating	1821-1830	air-dried,silica	GLOR01	TNE,MetOH+CaCl2+DTT	STE+0.4%_SDS+6%_PVP+5mM_PTB	4	4	74.8	0.0688	0.092	0.092	2x_vol_99%_ethanol		2017-11-27			GLOR01 1800s segments v1
heartwood	Surface_removal	burr-grinding,bead-beating	1821-1830	air-dried,silica	GLOR01	TNE,MetOH+CaCl2+DTT	STE+0.4%_SDS+6%_PVP+5mM_PTB	4	4	61	0.0436	0.0715	0.0715	2x_vol_99%_ethanol	failure	2017-11-27			GLOR01 1800s segments v1
heartwood	Surface_removal	burr-grinding,bead-beating	1821-1830	air-dried,silica	GLOR01	TNE,MetOH+CaCl2+DTT	STE+0.4%_SDS+6%_PVP+5mM_PTB	4	4	68.8	0.0416	0.0605	0.0605	2x_vol_99%_ethanol		2017-11-27			GLOR01 1800s segments v1
sapwood	Surface_removal	burr-grinding,bead-beating	2000-2014	air-dried,silica	GLOR01	TNE,MetOH+CaCl2+DTT	STE+0.4%_SDS+6%_PVP+5mM_PTB	4	4	52.3	1.14	2.1797	2.1797	2x_vol_99%_ethanol		2017-11-27			GLOR01 1800s segments v1
sapwood	Surface_removal	burr-grinding,bead-beating	2000-2014	air-dried,silica	GLOR01	TNE,MetOH+CaCl2+DTT	STE+0.4%_SDS+6%_PVP+5mM_PTB	4	4	46.2	0.76	1.645	1.645	2x_vol_99%_ethanol	success	2017-11-27			GLOR01 1800s segments v1
sapwood	Surface_removal	burr-grinding,bead-beating	2000-2014	air-dried,silica	GLOR01	TNE,MetOH+CaCl2+DTT	STE+0.4%_SDS+6%_PVP+5mM_PTB	4	4	44.1	0.876	1.9864	1.9864	2x_vol_99%_ethanol	success	2017-11-27			GLOR01 1800s segments v1
heartwood	5%_bleach,60%_EtOH,water	burr-grinding,bead-beating	1964-1980	air-dried,silica	GLOR07	TNE,MetOH+CaCl2+DTT	STE+0.4%_SDS+6%_PVP+5mM_PTB	4	4	73.5	0.0402	0.0547	0.0547	2x_vol_99%_ethanol	success	2017-11-27			GLOR07 1900s segments v2
heartwood	5%_bleach,60%_EtOH,water	burr-grinding,bead-beating	1964-1980	air-dried,silica	GLOR07	TNE,MetOH+CaCl2+DTT	STE+0.4%_SDS+6%_PVP+5mM_PTB	4	4	57.1	0.0318	0.0557	0.0557	2x_vol_99%_ethanol		2017-11-27			GLOR07 1900s segments v2
sapwood	5%_bleach,60%_EtOH,water	burr-grinding,bead-beating	1990-2014	air-dried,silica	GLOR07	TNE,MetOH+CaCl2+DTT	STE+0.4%_SDS+6%_PVP+5mM_PTB	4	4	50.8	0.174	0.3425	0.3425	2x_vol_99%_ethanol	success	2017-11-27			GLOR07 1900s segments v2
sapwood	5%_bleach,60%_EtOH,water	burr-grinding,bead-beating	1990-2014	air-dried,silica	GLOR07	TNE,MetOH+CaCl2+DTT	STE+0.4%_SDS+6%_PVP+5mM_PTB	4	4	50.1	0.326	0.6507	0.6507	2x_vol_99%_ethanol		2017-11-27			GLOR07 1900s segments v2
sapwood	Surface_removal	burr-grinding,bead-beating	2000-2014	air-dried,silica	GLOR01	TNE,MetOH+CaCl2+DTT	STE+0.4%_SDS+6%_PVP+5mM_PTB	4	4	53.9	0.952	1.7662	1.7662	2x_vol_99%_ethanol	success	2018-01-17			GLOR01 1900s segments
sapwood	Surface_removal	burr-grinding,bead-beating	2000-2014	air-dried,silica	GLOR01	TNE,MetOH+CaCl2+DTT	STE+0.4%_SDS+6%_PVP+5mM_PTB	4	4	43.8	0.77	1.758	1.758	2x_vol_99%_ethanol	success	2018-01-17			GLOR01 1900s segments
heartwood	5%_bleach,60%_EtOH,water	burr-grinding,bead-beating	1874-1883	air-dried,silica	GLOR07	TNE,MetOH+CaCl2+DTT	STE+0.4%_SDS+6%_PVP+5mM_PTB	4	4	73.3	0.0484	0.066	0.066	2x_vol_99%_ethanol	failure	2018-01-17	110.557		GLOR07 all segments
heartwood	5%_bleach,60%_EtOH,water	burr-grinding,bead-beating	1874-1883	air-dried,silica	GLOR07	TNE,MetOH+CaCl2+DTT	STE+0.4%_SDS+6%_PVP+5mM_PTB	4	4	68.3	0.0798	0.1168	0.1168	2x_vol_99%_ethanol	failure	2018-01-17	186.965		GLOR07 all segments
heartwood	5%_bleach,60%_EtOH,water	burr-grinding,bead-beating	1874-1883	air-dried,silica	GLOR07	TNE,MetOH+CaCl2+DTT	STE+0.4%_SDS+6%_PVP+5mM_PTB	4	4	74.4	0.0726	0.0976	0.0976	2x_vol_99%_ethanol	failure	2018-01-17	180.431		GLOR07 all segments
heartwood	5%_bleach,60%_EtOH,water	burr-grinding,bead-beating	1894-1903	air-dried,silica	GLOR07	TNE,MetOH+CaCl2+DTT	STE+0.4%_SDS+6%_PVP+5mM_PTB	4	4	53.1	0.0496	0.0934	0.0934	2x_vol_99%_ethanol	failure	2018-01-17	104.118		GLOR07 all segments
heartwood	5%_bleach,60%_EtOH,water	burr-grinding,bead-beating	1894-1903	air-dried,silica	GLOR07	TNE,MetOH+CaCl2+DTT	STE+0.4%_SDS+6%_PVP+5mM_PTB	4	4	53.6	0.0604	0.1127	0.1127	2x_vol_99%_ethanol	failure	2018-01-17	113.72		GLOR07 all segments
heartwood	5%_bleach,60%_EtOH,water	burr-grinding,bead-beating	1894-1903	air-dried,silica	GLOR07	TNE,MetOH+CaCl2+DTT	STE+0.4%_SDS+6%_PVP+5mM_PTB	4	4	67	0.0692	0.1033	0.1033	2x_vol_99%_ethanol	failure	2018-01-17	136.563		GLOR07 all segments
heartwood	5%_bleach,60%_EtOH,water	burr-grinding,bead-beating	1914-1923	air-dried,silica	GLOR07	TNE,MetOH+CaCl2+DTT	STE+0.4%_SDS+6%_PVP+5mM_PTB	4	4	77.4	0.0758	0.0979	0.0979	2x_vol_99%_ethanol	failure	2018-01-17	151.007		GLOR07 all segments	Positive control
heartwood	5%_bleach,60%_EtOH,water	burr-grinding,bead-beating	1914-1923	air-dried,silica	GLOR07	TNE,MetOH+CaCl2+DTT	STE+0.4%_SDS+6%_PVP+5mM_PTB	4	4	44.8	0.0516	0.1152	0.1152	2x_vol_99%_ethanol	failure	2018-01-17	95.3863		GLOR07 all segments
heartwood	5%_bleach,60%_EtOH,water	burr-grinding,bead-beating	1914-1923	air-dried,silica	GLOR07	TNE,MetOH+CaCl2+DTT	STE+0.4%_SDS+6%_PVP+5mM_PTB	4	4	46.6	0.034	0.073	0.073	2x_vol_99%_ethanol	failure	2018-01-17	50.7066		GLOR07 all segments
heartwood	5%_bleach,60%_EtOH,water	burr-grinding,bead-beating	1934-1943	air-dried,silica	GLOR07	TNE,MetOH+CaCl2+DTT	STE+0.4%_SDS+6%_PVP+5mM_PTB	4	4	67.1	0.0824	0.1228	0.1228	2x_vol_99%_ethanol	success	2018-01-17	126.779		GLOR07 all segments	Positive control
heartwood	5%_bleach,60%_EtOH,water	burr-grinding,bead-beating	1934-1943	air-dried,silica	GLOR07	TNE,MetOH+CaCl2+DTT	STE+0.4%_SDS+6%_PVP+5mM_PTB	4	4	58.4	0.0584	0.1	0.1	2x_vol_99%_ethanol	success	2018-01-17	78.2716		GLOR07 all segments
heartwood	5%_bleach,60%_EtOH,water	burr-grinding,bead-beating	1934-1943	air-dried,silica	GLOR07	TNE,MetOH+CaCl2+DTT	STE+0.4%_SDS+6%_PVP+5mM_PTB	4	4	60.7	0.035	0.0577	0.0577	2x_vol_99%_ethanol	success	2018-01-17	35.9238		GLOR07 all segments
heartwood	5%_bleach,60%_EtOH,water	burr-grinding,bead-beating	1954-1963	air-dried,silica	GLOR07	TNE,MetOH+CaCl2+DTT	STE+0.4%_SDS+6%_PVP+5mM_PTB	4	4	51.4	0.0564	0.1097	0.1097	2x_vol_99%_ethanol	success	2018-01-17	21.6567		GLOR07 all segments
heartwood	5%_bleach,60%_EtOH,water	burr-grinding,bead-beating	1954-1963	air-dried,silica	GLOR07	TNE,MetOH+CaCl2+DTT	STE+0.4%_SDS+6%_PVP+5mM_PTB	4	4	54.8	0.0308	0.0562	0.0562	2x_vol_99%_ethanol	success	2018-01-17	73.7439		GLOR07 all segments
heartwood	5%_bleach,60%_EtOH,water	burr-grinding,bead-beating	1954-1963	air-dried,silica	GLOR07	TNE,MetOH+CaCl2+DTT	STE+0.4%_SDS+6%_PVP+5mM_PTB	4	4	59.5	0.058	0.0975	0.0975	2x_vol_99%_ethanol	success	2018-01-17	64.0244		GLOR07 all segments
heartwood	5%_bleach,60%_EtOH,water	burr-grinding,bead-beating	1964-1980	air-dried,silica	GLOR07	TNE,MetOH+CaCl2+DTT	STE+0.4%_SDS+6%_PVP+5mM_PTB	4	4	59.5	0.0356	0.0598	0.0598	2x_vol_99%_ethanol	success	2018-01-17	45.0334		GLOR07 all segments
heartwood	5%_bleach,60%_EtOH,water	burr-grinding,bead-beating	1964-1980	air-dried,silica	GLOR07	TNE,MetOH+CaCl2+DTT	STE+0.4%_SDS+6%_PVP+5mM_PTB	4	4	68.5	0.054	0.0788	0.0788	2x_vol_99%_ethanol	success	2018-01-17	35.9458		GLOR07 all segments
heartwood	5%_bleach,60%_EtOH,water	burr-grinding,bead-beating	1964-1980	air-dried,silica	GLOR07	TNE,MetOH+CaCl2+DTT	STE+0.4%_SDS+6%_PVP+5mM_PTB	4	4	65.8	0.0436	0.0663	0.0663	2x_vol_99%_ethanol	success	2018-01-17			GLOR07 all segments
heartwood	5%_bleach,60%_EtOH,water	burr-grinding,bead-beating	1809-1814	air-dried,silica	GLOR07	TNE,MetOH+CaCl2+DTT	STE+0.4%_SDS+6%_PVP+5mM_PTB	4	4	61.9	0.029	0.0468	0.0468	2x_vol_99%_ethanol	failure	2018-01-23	79.0345		GLOR07 all segments
heartwood	5%_bleach,60%_EtOH,water	burr-grinding,bead-beating	1809-1814	air-dried,silica	GLOR07	TNE,MetOH+CaCl2+DTT	STE+0.4%_SDS+6%_PVP+5mM_PTB	4	4	76.3	0.0378	0.0495	0.0495	2x_vol_99%_ethanol	failure	2018-01-23	102.981		GLOR07 all segments
heartwood	5%_bleach,60%_EtOH,water	burr-grinding,bead-beating	1809-1814	air-dried,silica	GLOR07	TNE,MetOH+CaCl2+DTT	STE+0.4%_SDS+6%_PVP+5mM_PTB	4	4	42.3	0.0298	0.0704	0.0704	2x_vol_99%_ethanol	failure	2018-01-23	71.5754		GLOR07 all segments
heartwood	5%_bleach,60%_EtOH,water	burr-grinding,bead-beating	1815-1819	air-dried,silica	GLOR07	TNE,MetOH+CaCl2+DTT	STE+0.4%_SDS+6%_PVP+5mM_PTB	4	4	73.6	0.0444	0.0603	0.0603	2x_vol_99%_ethanol	failure	2018-01-23	116.106		GLOR07 all segments
heartwood	5%_bleach,60%_EtOH,water	burr-grinding,bead-beating	1815-1819	air-dried,silica	GLOR07	TNE,MetOH+CaCl2+DTT	STE+0.4%_SDS+6%_PVP+5mM_PTB	4	4	58.5	0.0458	0.0783	0.0783	2x_vol_99%_ethanol	failure	2018-01-23	121.275		GLOR07 all segments
heartwood	5%_bleach,60%_EtOH,water	burr-grinding,bead-beating	1815-1819	air-dried,silica	GLOR07	TNE,MetOH+CaCl2+DTT	STE+0.4%_SDS+6%_PVP+5mM_PTB	4	4	45.8	0.0392	0.0856	0.0856	2x_vol_99%_ethanol	failure	2018-01-23	98.9103		GLOR07 all segments
heartwood	5%_bleach,60%_EtOH,water	burr-grinding,bead-beating	1834-1843	air-dried,silica	GLOR07	TNE,MetOH+CaCl2+DTT	STE+0.4%_SDS+6%_PVP+5mM_PTB	4	4	69.4	0.0584	0.0841	0.0841	2x_vol_99%_ethanol	failure	2018-01-23	160.941		GLOR07 all segments
heartwood	5%_bleach,60%_EtOH,water	burr-grinding,bead-beating	1834-1843	air-dried,silica	GLOR07	TNE,MetOH+CaCl2+DTT	STE+0.4%_SDS+6%_PVP+5mM_PTB	4	4	85.3	0.0594	0.0696	0.0696	2x_vol_99%_ethanol	failure	2018-01-23	158.131		GLOR07 all segments
heartwood	5%_bleach,60%_EtOH,water	burr-grinding,bead-beating	1834-1843	air-dried,silica	GLOR07	TNE,MetOH+CaCl2+DTT	STE+0.4%_SDS+6%_PVP+5mM_PTB	4	4	73.7	0.048	0.0651	0.0651	2x_vol_99%_ethanol	failure	2018-01-23	126.651		GLOR07 all segments
heartwood	5%_bleach,60%_EtOH,water	burr-grinding,bead-beating	1854-1863	air-dried,silica	GLOR07	TNE,MetOH+CaCl2+DTT	STE+0.4%_SDS+6%_PVP+5mM_PTB	4	4	66	0.0488	0.0739	0.0739	2x_vol_99%_ethanol	failure	2018-01-23	112.969		GLOR07 all segments
heartwood	5%_bleach,60%_EtOH,water	burr-grinding,bead-beating	1854-1863	air-dried,silica	GLOR07	TNE,MetOH+CaCl2+DTT	STE+0.4%_SDS+6%_PVP+5mM_PTB	4	4	63.3	0.0442	0.0698	0.0698	2x_vol_99%_ethanol	failure	2018-01-23	97.8659		GLOR07 all segments
heartwood	5%_bleach,60%_EtOH,water	burr-grinding,bead-beating	1854-1863	air-dried,silica	GLOR07	TNE,MetOH+CaCl2+DTT	STE+0.4%_SDS+6%_PVP+5mM_PTB	4	4	48.4	0.0402	0.0831	0.0831	2x_vol_99%_ethanol	failure	2018-01-23	82.3442		GLOR07 all segments
heartwood	5%_bleach,60%_EtOH,water	burr-grinding,bead-beating	1944-1953	air-dried,silica	GLOR07	TNE,MetOH+CaCl2+DTT	STE+0.4%_SDS+6%_PVP+5mM_PTB	4	4	60.7	0.049	0.0807	0.0807	2x_vol_99%_ethanol	success	2018-01-23	109.036		GLOR07 all segments
heartwood	5%_bleach,60%_EtOH,water	burr-grinding,bead-beating	1944-1953	air-dried,silica	GLOR07	TNE,MetOH+CaCl2+DTT	STE+0.4%_SDS+6%_PVP+5mM_PTB	4	4	60.7	0.048	0.0791	0.0791	2x_vol_99%_ethanol	success	2018-01-23	79.654		GLOR07 all segments
heartwood	5%_bleach,60%_EtOH,water	burr-grinding,bead-beating	1944-1953	air-dried,silica	GLOR07	TNE,MetOH+CaCl2+DTT	STE+0.4%_SDS+6%_PVP+5mM_PTB	4	4	60.2	0.0482	0.0801	0.0801	2x_vol_99%_ethanol	success	2018-01-23	74.7706		GLOR07 all segments
heartwood	Surface_removal	burr-grinding,bead-beating	1890-1900	air-dried,silica	GLOR01	TNE,MetOH+CaCl2+DTT	STE+0.4%_SDS+6%_PVP+5mM_PTB	4	4	67	0.0258	0.0385	0.0385	2x_vol_99%_ethanol	failure	2018-02-02	71.023		GLOR01 1900s segments
heartwood	Surface_removal	burr-grinding,bead-beating	1890-1900	air-dried,silica	GLOR01	TNE,MetOH+CaCl2+DTT	STE+0.4%_SDS+6%_PVP+5mM_PTB	4	4	64	0.0144	0.0225	0.0225	2x_vol_99%_ethanol	failure	2018-02-02	39.1668		GLOR01 1900s segments
heartwood	Surface_removal	burr-grinding,bead-beating	1890-1900	air-dried,silica	GLOR01	TNE,MetOH+CaCl2+DTT	STE+0.4%_SDS+6%_PVP+5mM_PTB	4	4	65.3	0.0156	0.0239	0.0239	2x_vol_99%_ethanol	failure	2018-02-02	31.929		GLOR01 1900s segments
heartwood	Surface_removal	burr-grinding,bead-beating	1910-1920	air-dried,silica	GLOR01	TNE,MetOH+CaCl2+DTT	STE+0.4%_SDS+6%_PVP+5mM_PTB	4	4	64.8	0.051	0.0787	0.0787	2x_vol_99%_ethanol	failure	2018-02-02	401.488		GLOR01 1900s segments
heartwood	Surface_removal	burr-grinding,bead-beating	1910-1920	air-dried,silica	GLOR01	TNE,MetOH+CaCl2+DTT	STE+0.4%_SDS+6%_PVP+5mM_PTB	4	4	69.7	0.072	0.1033	0.1033	2x_vol_99%_ethanol	failure	2018-02-02	483.33		GLOR01 1900s segments
heartwood	Surface_removal	burr-grinding,bead-beating	1910-1920	air-dried,silica	GLOR01	TNE,MetOH+CaCl2+DTT	STE+0.4%_SDS+6%_PVP+5mM_PTB	4	4	58.4	0.0626	0.1072	0.1072	2x_vol_99%_ethanol	failure	2018-02-02	270.595		GLOR01 1900s segments
heartwood	Surface_removal	burr-grinding,bead-beating	1930-1940	air-dried,silica	GLOR01	TNE,MetOH+CaCl2+DTT	STE+0.4%_SDS+6%_PVP+5mM_PTB	4	4	60.8	0.06	0.0987	0.0987	2x_vol_99%_ethanol	success	2018-02-02			GLOR01 1900s segments
heartwood	Surface_removal	burr-grinding,bead-beating	1930-1940	air-dried,silica	GLOR01	TNE,MetOH+CaCl2+DTT	STE+0.4%_SDS+6%_PVP+5mM_PTB	4	4	71.2	0.0652	0.0916	0.0916	2x_vol_99%_ethanol	success	2018-02-02			GLOR01 1900s segments
heartwood	Surface_removal	burr-grinding,bead-beating	1930-1940	air-dried,silica	GLOR01	TNE,MetOH+CaCl2+DTT	STE+0.4%_SDS+6%_PVP+5mM_PTB	4	4	60.3	0.0736	0.1221	0.1221	2x_vol_99%_ethanol	success	2018-02-02			GLOR01 1900s segments
heartwood	Surface_removal	burr-grinding,bead-beating	1940-1950	air-dried,silica	GLOR01	TNE,MetOH+CaCl2+DTT	STE+0.4%_SDS+6%_PVP+5mM_PTB	4	4	64.6	0.0352	0.0545	0.0545	2x_vol_99%_ethanol	success	2018-02-02	69.1017		GLOR01 1900s segments	Positive control
heartwood	Surface_removal	burr-grinding,bead-beating	1940-1950	air-dried,silica	GLOR01	TNE,MetOH+CaCl2+DTT	STE+0.4%_SDS+6%_PVP+5mM_PTB	4	4	64.6	0.035	0.0542	0.0542	2x_vol_99%_ethanol	success	2018-02-02	57.1294		GLOR01 1900s segments
heartwood	Surface_removal	burr-grinding,bead-beating	1940-1950	air-dried,silica	GLOR01	TNE,MetOH+CaCl2+DTT	STE+0.4%_SDS+6%_PVP+5mM_PTB	4	4	47.2	0.0142	0.0301	0.0301	2x_vol_99%_ethanol	success	2018-02-02	34.5069		GLOR01 1900s segments
heartwood	Surface_removal	burr-grinding,bead-beating	1950-1960	air-dried,silica	GLOR01	TNE,MetOH+CaCl2+DTT	STE+0.4%_SDS+6%_PVP+5mM_PTB	4	4	64.5	0.0108	0.0167	0.0167	2x_vol_99%_ethanol	success	2018-02-02	9.37538		GLOR01 1900s segments
heartwood	Surface_removal	burr-grinding,bead-beating	1950-1960	air-dried,silica	GLOR01	TNE,MetOH+CaCl2+DTT	STE+0.4%_SDS+6%_PVP+5mM_PTB	4	4	48.2	0.0258	0.0535	0.0535	2x_vol_99%_ethanol	success	2018-02-02	22.8677		GLOR01 1900s segments
heartwood	Surface_removal	burr-grinding,bead-beating	1950-1960	air-dried,silica	GLOR01	TNE,MetOH+CaCl2+DTT	STE+0.4%_SDS+6%_PVP+5mM_PTB	4	4	58	0.019	0.0328	0.0328	2x_vol_99%_ethanol	success	2018-02-02	20.8975		GLOR01 1900s segments
heartwood	Surface_removal	burr-grinding,bead-beating	1970-1980	air-dried,silica	GLOR01	TNE,MetOH+CaCl2+DTT	STE+0.4%_SDS+6%_PVP+5mM_PTB	4	4	71.4	0.0176	0.0246	0.0246	2x_vol_99%_ethanol	success	2018-02-02	8.65165		GLOR01 1900s segments
heartwood	Surface_removal	burr-grinding,bead-beating	1970-1980	air-dried,silica	GLOR01	TNE,MetOH+CaCl2+DTT	STE+0.4%_SDS+6%_PVP+5mM_PTB	4	4	53.9	0.0152	0.0282	0.0282	2x_vol_99%_ethanol	success	2018-02-02	10.4585		GLOR01 1900s segments
heartwood	Surface_removal	burr-grinding,bead-beating	1970-1980	air-dried,silica	GLOR01	TNE,MetOH+CaCl2+DTT	STE+0.4%_SDS+6%_PVP+5mM_PTB	4	4	56.7	0.012	0.0212	0.0212	2x_vol_99%_ethanol	success	2018-02-02	2.22303		GLOR01 1900s segments
sapwood	Surface_removal	burr-grinding,bead-beating	2000-2014	air-dried,silica	GLOR01	TNE,MetOH+CaCl2+DTT	STE+0.4%_SDS+6%_PVP+5mM_PTB	4	4	32.6	0.103	0.316	0.316	2x_vol_99%_ethanol	success	2018-02-02			GLOR01 1900s segments
heartwood	Surface_removal	burr-grinding,bead-beating	1811-1815	air-dried,silica	GLOR01	TNE,MetOH+CaCl2+DTT	STE+0.4%_SDS+6%_PVP+5mM_PTB	4	4	45.5	0.0422	0.0927	0.0927	2x_vol_99%_ethanol	success	2018-02-07	78.977		GLOR01 1800s segments v2
heartwood	Surface_removal	burr-grinding,bead-beating	1811-1815	air-dried,silica	GLOR01	TNE,MetOH+CaCl2+DTT	STE+0.4%_SDS+6%_PVP+5mM_PTB	4	4	49.9	0.0474	0.095	0.095	2x_vol_99%_ethanol	success	2018-02-07	93.2678		GLOR01 1800s segments v2
heartwood	Surface_removal	burr-grinding,bead-beating	1811-1815	air-dried,silica	GLOR01	TNE,MetOH+CaCl2+DTT	STE+0.4%_SDS+6%_PVP+5mM_PTB	4	4	43.3	0.051	0.1178	0.1178	2x_vol_99%_ethanol	success	2018-02-07	92.9142		GLOR01 1800s segments v2
heartwood	Surface_removal	burr-grinding,bead-beating	1816-1820	air-dried,silica	GLOR01	TNE,MetOH+CaCl2+DTT	STE+0.4%_SDS+6%_PVP+5mM_PTB	4	4	59.5	0.0506	0.085	0.085	2x_vol_99%_ethanol	success	2018-02-07	114.588		GLOR01 1800s segments v2
heartwood	Surface_removal	burr-grinding,bead-beating	1816-1820	air-dried,silica	GLOR01	TNE,MetOH+CaCl2+DTT	STE+0.4%_SDS+6%_PVP+5mM_PTB	4	4	66.2	0.0596	0.09	0.09	2x_vol_99%_ethanol	success	2018-02-07	83.299		GLOR01 1800s segments v2
heartwood	Surface_removal	burr-grinding,bead-beating	1816-1820	air-dried,silica	GLOR01	TNE,MetOH+CaCl2+DTT	STE+0.4%_SDS+6%_PVP+5mM_PTB	4	4	70.6	0.0548	0.0776	0.0776	2x_vol_99%_ethanol	success	2018-02-07	146.965		GLOR01 1800s segments v2
heartwood	Surface_removal	burr-grinding,bead-beating	1821-1830	air-dried,silica	GLOR01	TNE,MetOH+CaCl2+DTT	STE+0.4%_SDS+6%_PVP+5mM_PTB	4	4	71.6	0.14	0.1955	0.1955	2x_vol_99%_ethanol	success	2018-02-07	409.888		GLOR01 1800s segments v2
heartwood	Surface_removal	burr-grinding,bead-beating	1821-1830	air-dried,silica	GLOR01	TNE,MetOH+CaCl2+DTT	STE+0.4%_SDS+6%_PVP+5mM_PTB	4	4	44.6	0.143	0.3206	0.3206	2x_vol_99%_ethanol	success	2018-02-07	220.514		GLOR01 1800s segments v2
heartwood	Surface_removal	burr-grinding,bead-beating	1821-1830	air-dried,silica	GLOR01	TNE,MetOH+CaCl2+DTT	STE+0.4%_SDS+6%_PVP+5mM_PTB	4	4	38.5	0.123	0.3195	0.3195	2x_vol_99%_ethanol	success	2018-02-07	215.259		GLOR01 1800s segments v2
heartwood	Surface_removal	burr-grinding,bead-beating	1836-1840	air-dried,silica	GLOR01	TNE,MetOH+CaCl2+DTT	STE+0.4%_SDS+6%_PVP+5mM_PTB	4	4	44	0.123	0.2795	0.2795	2x_vol_99%_ethanol	failure	2018-02-07	613.844		GLOR01 1800s segments v2
heartwood	Surface_removal	burr-grinding,bead-beating	1836-1840	air-dried,silica	GLOR01	TNE,MetOH+CaCl2+DTT	STE+0.4%_SDS+6%_PVP+5mM_PTB	4	4	52.1	0.152	0.2917	0.2917	2x_vol_99%_ethanol	failure	2018-02-07	670.741		GLOR01 1800s segments v2
heartwood	Surface_removal	burr-grinding,bead-beating	1836-1840	air-dried,silica	GLOR01	TNE,MetOH+CaCl2+DTT	STE+0.4%_SDS+6%_PVP+5mM_PTB	4	4	44.3	0.107	0.2415	0.2415	2x_vol_99%_ethanol	failure	2018-02-07	578.776		GLOR01 1800s segments v2	Positive control
heartwood	Surface_removal	burr-grinding,bead-beating	1851-1860	air-dried,silica	GLOR01	TNE,MetOH+CaCl2+DTT	STE+0.4%_SDS+6%_PVP+5mM_PTB	4	4	46	0.141	0.3065	0.3065	2x_vol_99%_ethanol	failure	2018-02-07	732.14		GLOR01 1800s segments v2
heartwood	Surface_removal	burr-grinding,bead-beating	1851-1860	air-dried,silica	GLOR01	TNE,MetOH+CaCl2+DTT	STE+0.4%_SDS+6%_PVP+5mM_PTB	4	4	49.9	0.167	0.3347	0.3347	2x_vol_99%_ethanol	failure	2018-02-07	793.129		GLOR01 1800s segments v2
heartwood	Surface_removal	burr-grinding,bead-beating	1851-1860	air-dried,silica	GLOR01	TNE,MetOH+CaCl2+DTT	STE+0.4%_SDS+6%_PVP+5mM_PTB	4	4	60.3	0.174	0.2886	0.2886	2x_vol_99%_ethanol	failure	2018-02-07	878.034		GLOR01 1800s segments v2
heartwood	Surface_removal	burr-grinding,bead-beating	1871-1880	air-dried,silica	GLOR01	TNE,MetOH+CaCl2+DTT	STE+0.4%_SDS+6%_PVP+5mM_PTB	4	4	61.7	0.0658	0.1066	0.1066	2x_vol_99%_ethanol	failure	2018-02-07	212.369		GLOR01 1800s segments v2
heartwood	Surface_removal	burr-grinding,bead-beating	1871-1880	air-dried,silica	GLOR01	TNE,MetOH+CaCl2+DTT	STE+0.4%_SDS+6%_PVP+5mM_PTB	4	4	63	0.0626	0.0994	0.0994	2x_vol_99%_ethanol	failure	2018-02-07	204.749		GLOR01 1800s segments v2
heartwood	Surface_removal	burr-grinding,bead-beating	1871-1880	air-dried,silica	GLOR01	TNE,MetOH+CaCl2+DTT	STE+0.4%_SDS+6%_PVP+5mM_PTB	4	4	63	0.051	0.081	0.081	2x_vol_99%_ethanol	failure	2018-02-07	161.887		GLOR01 1800s segments v2
sapwood	Surface_removal	burr-grinding,bead-beating	2000-2014	air-dried,silica	GLOR01	TNE,MetOH+CaCl2+DTT	STE+0.4%_SDS+6%_PVP+5mM_PTB	4	4	48.4	0.648	1.3388	1.3388	2x_vol_99%_ethanol	success	2018-02-07			GLOR01 1800s segments v2
heartwood	Surface_removal	burr-grinding,bead-beating	1811-1815	air-dried,silica	GLOR01	TNE,MetOH+CaCl2+DTT	STE+0.4%_SDS+6%_PVP+5mM_PTB	4	4	48.8	0.0392	0.0803	0.0803	2x_vol_99%_ethanol		2018-02-20			GLOR01 1800s segments v3
heartwood	Surface_removal	burr-grinding,bead-beating	1811-1815	air-dried,silica	GLOR01	TNE,MetOH+CaCl2+DTT	STE+0.4%_SDS+6%_PVP+5mM_PTB	4	4	46.1	0.0368	0.0798	0.0798	2x_vol_99%_ethanol		2018-02-20			GLOR01 1800s segments v3
heartwood	Surface_removal	burr-grinding,bead-beating	1811-1815	air-dried,silica	GLOR01	TNE,MetOH+CaCl2+DTT	STE+0.4%_SDS+6%_PVP+5mM_PTB	4	4	45.7	0.0392	0.0858	0.0858	2x_vol_99%_ethanol		2018-02-20			GLOR01 1800s segments v3
heartwood	Surface_removal	burr-grinding,bead-beating	1821-1830	air-dried,silica	GLOR01	TNE,MetOH+CaCl2+DTT	STE+0.4%_SDS+6%_PVP+5mM_PTB	4	4	62.4	0.164	0.2628	0.2628	2x_vol_99%_ethanol		2018-02-20			GLOR01 1800s segments v3
heartwood	Surface_removal	burr-grinding,bead-beating	1821-1830	air-dried,silica	GLOR01	TNE,MetOH+CaCl2+DTT	STE+0.4%_SDS+6%_PVP+5mM_PTB	4	4	55	0.138	0.2509	0.2509	2x_vol_99%_ethanol		2018-02-20			GLOR01 1800s segments v3
heartwood	Surface_removal	burr-grinding,bead-beating	1821-1830	air-dried,silica	GLOR01	TNE,MetOH+CaCl2+DTT	STE+0.4%_SDS+6%_PVP+5mM_PTB	4	4	47.7	0.176	0.369	0.369	2x_vol_99%_ethanol		2018-02-20			GLOR01 1800s segments v3
heartwood	5%_bleach,60%_EtOH,water	burr-grinding,bead-beating	1964-1980	air-dried,silica	GLOR07	TNE,MetOH+CaCl2+DTT	STE+0.4%_SDS+6%_PVP+5mM_PTB	4	4	57.7	0.001	0.0017331	0.0017331	2x_vol_99%_ethanol		2018-02-20		failure	GLOR07 single tube v1
heartwood	5%_bleach,60%_EtOH,water	burr-grinding,bead-beating	1964-1980	air-dried,silica	GLOR07	TNE,MetOH+CaCl2+DTT	STE+0.4%_SDS+6%_PVP+5mM_PTB	4	4	55.5	0.001	0.0018018	0.0018018	2x_vol_99%_ethanol		2018-02-20		failure	GLOR07 single tube v1
heartwood	5%_bleach,60%_EtOH,water	burr-grinding,bead-beating	1964-1980	air-dried,silica	GLOR07	TNE,MetOH+CaCl2+DTT	STE+0.4%_SDS+6%_PVP+5mM_PTB	4	4	47.2	0.001	0.00211864	0.00211864	2x_vol_99%_ethanol		2018-02-20		failure	GLOR07 single tube v1
heartwood	5%_bleach,60%_EtOH,water	burr-grinding,bead-beating	1964-1980	air-dried,silica	GLOR07	TNE,MetOH+CaCl2+DTT	STE+0.4%_SDS+6%_PVP+5mM_PTB	4	4	53.8	0.001	0.00185874	0.00185874	2x_vol_99%_ethanol		2018-02-20			GLOR07 single tube v1
heartwood	5%_bleach,60%_EtOH,water	burr-grinding,bead-beating	1964-1980	air-dried,silica	GLOR07	TNE,MetOH+CaCl2+DTT	STE+0.4%_SDS+6%_PVP+5mM_PTB	4	4	49.7	0.001	0.00201207	0.00201207	2x_vol_99%_ethanol		2018-02-20			GLOR07 single tube v1
heartwood	5%_bleach,60%_EtOH,water	burr-grinding,bead-beating	1964-1980	air-dried,silica	GLOR07	TNE,MetOH+CaCl2+DTT	STE+0.4%_SDS+6%_PVP+5mM_PTB	4	4	50.3	0.0312	0.0620278	0.0620278	2x_vol_99%_ethanol		2018-02-20			GLOR07 single tube v1
heartwood	Surface_removal	burr-grinding,bead-beating	1811-1815	air-dried,silica	GLOR01	TNE,MetOH+CaCl2+DTT	STE+0.4%_SDS+6%_PVP+5mM_PTB	4	4	48.5	0.046	0.0948	0.0948	2x_vol_99%_ethanol		2018-03-27			GLOR01 1800s segments v3
heartwood	Surface_removal	burr-grinding,bead-beating	1811-1815	air-dried,silica	GLOR01	TNE,MetOH+CaCl2+DTT	STE+0.4%_SDS+6%_PVP+5mM_PTB	4	4	56.6	0.062	0.1095	0.1095	2x_vol_99%_ethanol	success	2018-03-27			GLOR01 1800s segments v3
heartwood	Surface_removal	burr-grinding,bead-beating	1811-1815	air-dried,silica	GLOR01	TNE,MetOH+CaCl2+DTT	STE+0.4%_SDS+6%_PVP+5mM_PTB	4	4	26.5	0.0348	0.1313	0.1313	2x_vol_99%_ethanol		2018-03-27			GLOR01 1800s segments v3
heartwood	Surface_removal	burr-grinding,bead-beating	1811-1815	air-dried,silica	GLOR01	TNE,MetOH+CaCl2+DTT	STE+0.4%_SDS+6%_PVP+5mM_PTB	4	4	41.2	0.0316	0.0767	0.0767	2x_vol_99%_ethanol		2018-03-27			GLOR01 1800s segments v3
heartwood	Surface_removal	burr-grinding,bead-beating	1811-1815	air-dried,silica	GLOR01	TNE,MetOH+CaCl2+DTT	STE+0.4%_SDS+6%_PVP+5mM_PTB	4	4	58.6	0.0536	0.0915	0.0915	2x_vol_99%_ethanol	success	2018-03-27			GLOR01 1800s segments v3
heartwood	Surface_removal	burr-grinding,bead-beating	1811-1815	air-dried,silica	GLOR01	TNE,MetOH+CaCl2+DTT	STE+0.4%_SDS+6%_PVP+5mM_PTB	4	4	70.2	0.0748	0.1066	0.1066	2x_vol_99%_ethanol	success	2018-03-27			GLOR01 1800s segments v3
heartwood	Surface_removal	burr-grinding,bead-beating	1816-1820	air-dried,silica	GLOR01	TNE,MetOH+CaCl2+DTT	STE+0.4%_SDS+6%_PVP+5mM_PTB	4	4	77.6	0.0604	0.0778	0.0778	2x_vol_99%_ethanol		2018-03-27			GLOR01 1800s segments v3
heartwood	Surface_removal	burr-grinding,bead-beating	1816-1820	air-dried,silica	GLOR01	TNE,MetOH+CaCl2+DTT	STE+0.4%_SDS+6%_PVP+5mM_PTB	4	4	70.4	0.0736	0.1045	0.1045	2x_vol_99%_ethanol	success	2018-03-27			GLOR01 1800s segments v3
heartwood	Surface_removal	burr-grinding,bead-beating	1816-1820	air-dried,silica	GLOR01	TNE,MetOH+CaCl2+DTT	STE+0.4%_SDS+6%_PVP+5mM_PTB	4	4	73	0.0712	0.0975	0.0975	2x_vol_99%_ethanol	success	2018-03-27			GLOR01 1800s segments v3
heartwood	Surface_removal	burr-grinding,bead-beating	1816-1820	air-dried,silica	GLOR01	TNE,MetOH+CaCl2+DTT	STE+0.4%_SDS+6%_PVP+5mM_PTB	4	4	66	0.0608	0.0921	0.0921	2x_vol_99%_ethanol		2018-03-27			GLOR01 1800s segments v3
heartwood	Surface_removal	burr-grinding,bead-beating	1816-1820	air-dried,silica	GLOR01	TNE,MetOH+CaCl2+DTT	STE+0.4%_SDS+6%_PVP+5mM_PTB	4	4	75.8	0.084	0.1108	0.1108	2x_vol_99%_ethanol		2018-03-27			GLOR01 1800s segments v3
heartwood	Surface_removal	burr-grinding,bead-beating	1816-1820	air-dried,silica	GLOR01	TNE,MetOH+CaCl2+DTT	STE+0.4%_SDS+6%_PVP+5mM_PTB	4	4	79.9	0.0708	0.0886	0.0886	2x_vol_99%_ethanol	success	2018-03-27			GLOR01 1800s segments v3
heartwood	5%_bleach,60%_EtOH,water	burr-grinding,bead-beating	1934-1943	air-dried,silica	GLOR07	TNE,MetOH+CaCl2+DTT	STE+0.4%_SDS+6%_PVP+5mM_PTB	4	4	54.6	0.0288	0.0527	0.0527	2x_vol_99%_ethanol		2018-03-27		failure	GLOR07 single tube v1
heartwood	5%_bleach,60%_EtOH,water	burr-grinding,bead-beating	1934-1943	air-dried,silica	GLOR07	TNE,MetOH+CaCl2+DTT	STE+0.4%_SDS+6%_PVP+5mM_PTB	4	4	46.1	0.022	0.0477	0.0477	2x_vol_99%_ethanol		2018-03-27			GLOR07 single tube v1
heartwood	5%_bleach,60%_EtOH,water	burr-grinding,bead-beating	1934-1943	air-dried,silica	GLOR07	TNE,MetOH+CaCl2+DTT	STE+0.4%_SDS+6%_PVP+5mM_PTB	4	4	60.9	0.024	0.0394	0.0394	2x_vol_99%_ethanol	success	2018-03-27			GLOR07 single tube v1
heartwood	5%_bleach,60%_EtOH,water	burr-grinding,bead-beating	1934-1943	air-dried,silica	GLOR07	TNE,MetOH+CaCl2+DTT	STE+0.4%_SDS+6%_PVP+5mM_PTB	4	4	45.6	0.0384	0.0842	0.0842	2x_vol_99%_ethanol	success	2018-03-27		failure	GLOR07 single tube v1
heartwood	5%_bleach,60%_EtOH,water	burr-grinding,bead-beating	1934-1943	air-dried,silica	GLOR07	TNE,MetOH+CaCl2+DTT	STE+0.4%_SDS+6%_PVP+5mM_PTB	4	4	74.3	0.0344	0.0463	0.0463	2x_vol_99%_ethanol		2018-03-27			GLOR07 single tube v1
heartwood	5%_bleach,60%_EtOH,water	burr-grinding,bead-beating	1934-1943	air-dried,silica	GLOR07	TNE,MetOH+CaCl2+DTT	STE+0.4%_SDS+6%_PVP+5mM_PTB	4	4	67.7	0.04	0.0591	0.0591	2x_vol_99%_ethanol	success	2018-03-27		failure	GLOR07 single tube v1
heartwood	5%_bleach,60%_EtOH,water	burr-grinding,bead-beating	1874-1883	air-dried,silica	GLOR07	none	STE+0.4%_SDS+6%_PVP+5mM_PTB	4	4	79.1	0.0936	0.1183	0.1183	2x_vol_99%_ethanol	failure	2018-05-07	317.846		Bead-beating
heartwood	5%_bleach,60%_EtOH,water	burr-grinding,bead-beating	1874-1883	air-dried,silica	GLOR07	none	STE+0.4%_SDS+6%_PVP+5mM_PTB	4	4	114.9	0.0732	0.0637	0.0637	2x_vol_99%_ethanol	failure	2018-05-07	257.286		Bead-beating
heartwood	5%_bleach,60%_EtOH,water	burr-grinding,bead-beating	1874-1883	air-dried,silica	GLOR07	none	STE+0.4%_SDS+6%_PVP+5mM_PTB	4	4	67	0.0536	0.08	0.08	2x_vol_99%_ethanol	failure	2018-05-07	168.232		Bead-beating
heartwood	5%_bleach,60%_EtOH,water	burr-grinding,bead-beating	1894-1903	air-dried,silica	GLOR07	none	STE+0.4%_SDS+6%_PVP+5mM_PTB	4	4	76.4	0.117	0.1531	0.1531	2x_vol_99%_ethanol	failure	2018-05-07	302.799		Bead-beating
heartwood	5%_bleach,60%_EtOH,water	burr-grinding,bead-beating	1894-1903	air-dried,silica	GLOR07	none	STE+0.4%_SDS+6%_PVP+5mM_PTB	4	4	86.2	0.103	0.1195	0.1195	2x_vol_99%_ethanol	failure	2018-05-07	295.89		Bead-beating
heartwood	5%_bleach,60%_EtOH,water	burr-grinding,bead-beating	1894-1903	air-dried,silica	GLOR07	none	STE+0.4%_SDS+6%_PVP+5mM_PTB	4	4	101.3	0.134	0.1323	0.1323	2x_vol_99%_ethanol	failure	2018-05-07	398.35		Bead-beating
heartwood	5%_bleach,60%_EtOH,water	burr-grinding,bead-beating	1914-1923	air-dried,silica	GLOR07	none	STE+0.4%_SDS+6%_PVP+5mM_PTB	4	4	82	0.171	0.2085	0.2085	2x_vol_99%_ethanol	failure	2018-05-07	515.058		Bead-beating
heartwood	5%_bleach,60%_EtOH,water	burr-grinding,bead-beating	1914-1923	air-dried,silica	GLOR07	none	STE+0.4%_SDS+6%_PVP+5mM_PTB	4	4	70.7	0.147	0.2079	0.2079	2x_vol_99%_ethanol	failure	2018-05-07	437.268		Bead-beating
heartwood	5%_bleach,60%_EtOH,water	burr-grinding,bead-beating	1914-1923	air-dried,silica	GLOR07	none	STE+0.4%_SDS+6%_PVP+5mM_PTB	4	4	81.4	0.162	0.199	0.199	2x_vol_99%_ethanol	failure	2018-05-07	490.236		Bead-beating
heartwood	5%_bleach,60%_EtOH,water	burr-grinding,bead-beating	1934-1943	air-dried,silica	GLOR07	none	STE+0.4%_SDS+6%_PVP+5mM_PTB	4	4	33.3	0.115	0.3453	0.3453	2x_vol_99%_ethanol	success	2018-05-07	171.108		Bead-beating
heartwood	5%_bleach,60%_EtOH,water	burr-grinding,bead-beating	1934-1943	air-dried,silica	GLOR07	none	STE+0.4%_SDS+6%_PVP+5mM_PTB	4	4	52.3	0.125	0.239	0.239	2x_vol_99%_ethanol	success	2018-05-07	206.207		Bead-beating
heartwood	5%_bleach,60%_EtOH,water	burr-grinding,bead-beating	1934-1943	air-dried,silica	GLOR07	none	STE+0.4%_SDS+6%_PVP+5mM_PTB	4	4	39.7	0.148	0.3728	0.3728	2x_vol_99%_ethanol	success	2018-05-07	209.774		Bead-beating
heartwood	5%_bleach,60%_EtOH,water	burr-grinding,bead-beating	1944-1953	air-dried,silica	GLOR07	none	STE+0.4%_SDS+6%_PVP+5mM_PTB	4	4	88.5	0.214	0.2418	0.2418	2x_vol_99%_ethanol	success	2018-05-07	503.967		Bead-beating
heartwood	5%_bleach,60%_EtOH,water	burr-grinding,bead-beating	1944-1953	air-dried,silica	GLOR07	none	STE+0.4%_SDS+6%_PVP+5mM_PTB	4	4	60.7	0.118	0.1944	0.1944	2x_vol_99%_ethanol	success	2018-05-07	296.316		Bead-beating
heartwood	5%_bleach,60%_EtOH,water	burr-grinding,bead-beating	1944-1953	air-dried,silica	GLOR07	none	STE+0.4%_SDS+6%_PVP+5mM_PTB	4	4	74.1	0.125	0.1687	0.1687	2x_vol_99%_ethanol	success	2018-05-07	294.731		Bead-beating
heartwood	5%_bleach,60%_EtOH,water	burr-grinding,bead-beating	1954-1963	air-dried,silica	GLOR07	none	STE+0.4%_SDS+6%_PVP+5mM_PTB	4	4	80.9	0.214	0.2645	0.2645	2x_vol_99%_ethanol	success	2018-05-07	509.482		Bead-beating
heartwood	5%_bleach,60%_EtOH,water	burr-grinding,bead-beating	1954-1963	air-dried,silica	GLOR07	none	STE+0.4%_SDS+6%_PVP+5mM_PTB	4	4	67.1	0.214	0.3189	0.3189	2x_vol_99%_ethanol	success	2018-05-07	438.293		Bead-beating
heartwood	5%_bleach,60%_EtOH,water	burr-grinding,bead-beating	1954-1963	air-dried,silica	GLOR07	none	STE+0.4%_SDS+6%_PVP+5mM_PTB	4	4	57.8	0.199	0.3443	0.3443	2x_vol_99%_ethanol	success	2018-05-07	324.014		Bead-beating
heartwood	5%_bleach,60%_EtOH,water	burr-grinding,bead-beating	1964-1980	air-dried,silica	GLOR07	none	STE+0.4%_SDS+6%_PVP+5mM_PTB	4	4	56.3	0.274	0.4867	0.4867	2x_vol_99%_ethanol	success	2018-05-07			Bead-beating
heartwood	5%_bleach,60%_EtOH,water	burr-grinding	1874-1883	air-dried,silica	GLOR07	none	STE+0.4%_SDS+6%_PVP+5mM_PTB	4	4	74.4	0.0256	0.0344	0.0344	2x_vol_99%_ethanol	failure	2018-05-09	66.1724		Bead-beating
heartwood	5%_bleach,60%_EtOH,water	burr-grinding	1874-1883	air-dried,silica	GLOR07	none	STE+0.4%_SDS+6%_PVP+5mM_PTB	4	4	54.1	0.037	0.0684	0.0684	2x_vol_99%_ethanol	failure	2018-05-09	120.135		Bead-beating
heartwood	5%_bleach,60%_EtOH,water	burr-grinding	1874-1883	air-dried,silica	GLOR07	none	STE+0.4%_SDS+6%_PVP+5mM_PTB	4	4	77.9	0.0306	0.0393	0.0393	2x_vol_99%_ethanol	failure	2018-05-09	84.0555		Bead-beating
heartwood	5%_bleach,60%_EtOH,water	burr-grinding	1894-1903	air-dried,silica	GLOR07	none	STE+0.4%_SDS+6%_PVP+5mM_PTB	4	4	70.4	0.0184	0.0261	0.0261	2x_vol_99%_ethanol	failure	2018-05-09	96.5871		Bead-beating
heartwood	5%_bleach,60%_EtOH,water	burr-grinding	1894-1903	air-dried,silica	GLOR07	none	STE+0.4%_SDS+6%_PVP+5mM_PTB	4	4	96.4	0.0412	0.0427	0.0427	2x_vol_99%_ethanol	failure	2018-05-09	149.367		Bead-beating
heartwood	5%_bleach,60%_EtOH,water	burr-grinding	1894-1903	air-dried,silica	GLOR07	none	STE+0.4%_SDS+6%_PVP+5mM_PTB	4	4	65.3	0.0162	0.0248	0.0248	2x_vol_99%_ethanol	failure	2018-05-09	54.5767		Bead-beating
heartwood	5%_bleach,60%_EtOH,water	burr-grinding	1914-1923	air-dried,silica	GLOR07	none	STE+0.4%_SDS+6%_PVP+5mM_PTB	4	4	47.5	0.042	0.0884	0.0884	2x_vol_99%_ethanol	failure	2018-05-09	193.07		Bead-beating
heartwood	5%_bleach,60%_EtOH,water	burr-grinding	1914-1923	air-dried,silica	GLOR07	none	STE+0.4%_SDS+6%_PVP+5mM_PTB	4	4	76.3	0.0456	0.0598	0.0598	2x_vol_99%_ethanol	failure	2018-05-09	183.258		Bead-beating
heartwood	5%_bleach,60%_EtOH,water	burr-grinding	1914-1923	air-dried,silica	GLOR07	none	STE+0.4%_SDS+6%_PVP+5mM_PTB	4	4	53.4	0.02	0.0375	0.0375	2x_vol_99%_ethanol	failure	2018-05-09	91.0418		Bead-beating
heartwood	5%_bleach,60%_EtOH,water	burr-grinding	1934-1943	air-dried,silica	GLOR07	none	STE+0.4%_SDS+6%_PVP+5mM_PTB	4	4	58.4	0.0666	0.114	0.114	2x_vol_99%_ethanol	success	2018-05-09	122.016		Bead-beating
heartwood	5%_bleach,60%_EtOH,water	burr-grinding	1944-1953	air-dried,silica	GLOR07	none	STE+0.4%_SDS+6%_PVP+5mM_PTB	4	4	69.1	0.0408	0.059	0.059	2x_vol_99%_ethanol	success	2018-05-09	88.0486		Bead-beating
heartwood	5%_bleach,60%_EtOH,water	burr-grinding	1944-1953	air-dried,silica	GLOR07	none	STE+0.4%_SDS+6%_PVP+5mM_PTB	4	4	78.8	0.029	0.0368	0.0368	2x_vol_99%_ethanol	success	2018-05-09	134.266		Bead-beating
heartwood	5%_bleach,60%_EtOH,water	burr-grinding	1944-1953	air-dried,silica	GLOR07	none	STE+0.4%_SDS+6%_PVP+5mM_PTB	4	4	72.2	0.0526	0.0729	0.0729	2x_vol_99%_ethanol	success	2018-05-09	164.771		Bead-beating
heartwood	5%_bleach,60%_EtOH,water	burr-grinding	1954-1963	air-dried,silica	GLOR07	none	STE+0.4%_SDS+6%_PVP+5mM_PTB	4	4	82.1	0.0742	0.0904	0.0904	2x_vol_99%_ethanol	success	2018-05-09	154.773		Bead-beating
heartwood	5%_bleach,60%_EtOH,water	burr-grinding	1809-1814	air-dried,silica	GLOR07	none	STE+0.4%_SDS+6%_PVP+5mM_PTB	4	4	19.1	0.001	0.0052356	0.0052356	2x_vol_99%_ethanol	failure	2018-05-15	0		Bead-beating
heartwood	5%_bleach,60%_EtOH,water	burr-grinding	1815-1819	air-dried,silica	GLOR07	none	STE+0.4%_SDS+6%_PVP+5mM_PTB	4	4	30.8	0.0122	0.0396	0.0396	2x_vol_99%_ethanol	failure	2018-05-15	9.50486		Bead-beating
heartwood	5%_bleach,60%_EtOH,water	burr-grinding	1834-1843	air-dried,silica	GLOR07	none	STE+0.4%_SDS+6%_PVP+5mM_PTB	4	4	63.5	0.0366	0.0576	0.0576	2x_vol_99%_ethanol	failure	2018-05-15	112.742		Bead-beating
heartwood	5%_bleach,60%_EtOH,water	burr-grinding	1834-1843	air-dried,silica	GLOR07	none	STE+0.4%_SDS+6%_PVP+5mM_PTB	4	4	58.4	0.0208	0.0356	0.0356	2x_vol_99%_ethanol	failure	2018-05-15	66.0096		Bead-beating
heartwood	5%_bleach,60%_EtOH,water	burr-grinding	1834-1843	air-dried,silica	GLOR07	none	STE+0.4%_SDS+6%_PVP+5mM_PTB	4	4	63.1	0.023	0.0365	0.0365	2x_vol_99%_ethanol	failure	2018-05-15	60.6002		Bead-beating
heartwood	5%_bleach,60%_EtOH,water	burr-grinding	1854-1863	air-dried,silica	GLOR07	none	STE+0.4%_SDS+6%_PVP+5mM_PTB	4	4	67	0.0224	0.0334	0.0334	2x_vol_99%_ethanol	failure	2018-05-15	84.0114		Bead-beating
heartwood	5%_bleach,60%_EtOH,water	burr-grinding	1854-1863	air-dried,silica	GLOR07	none	STE+0.4%_SDS+6%_PVP+5mM_PTB	4	4	57.1	0.0164	0.0287	0.0287	2x_vol_99%_ethanol	failure	2018-05-15	58.0084		Bead-beating
heartwood	5%_bleach,60%_EtOH,water	burr-grinding	1854-1863	air-dried,silica	GLOR07	none	STE+0.4%_SDS+6%_PVP+5mM_PTB	4	4	67.5	0.023	0.0341	0.0341	2x_vol_99%_ethanol	failure	2018-05-15	92.9835		Bead-beating
heartwood	5%_bleach,60%_EtOH,water	burr-grinding,bead-beating	1809-1814	air-dried,silica	GLOR07	none	STE+0.4%_SDS+6%_PVP+5mM_PTB	4	4	38.6	0.0614	0.159067	0.159067	2x_vol_99%_ethanol	failure	2018-05-23	105.821		Bead-beating
heartwood	5%_bleach,60%_EtOH,water	burr-grinding,bead-beating	1815-1819	air-dried,silica	GLOR07	none	STE+0.4%_SDS+6%_PVP+5mM_PTB	4	4	21.6	0.0406	0.187963	0.187963	2x_vol_99%_ethanol	failure	2018-05-23	74.5793		Bead-beating
heartwood	5%_bleach,60%_EtOH,water	burr-grinding,bead-beating	1834-1843	air-dried,silica	GLOR07	none	STE+0.4%_SDS+6%_PVP+5mM_PTB	4	4	67.1	0.0784	0.116841	0.116841	2x_vol_99%_ethanol	failure	2018-05-23	182.283		Bead-beating
heartwood	5%_bleach,60%_EtOH,water	burr-grinding,bead-beating	1834-1843	air-dried,silica	GLOR07	none	STE+0.4%_SDS+6%_PVP+5mM_PTB	4	4	68.9	0.0988	0.143396	0.143396	2x_vol_99%_ethanol	failure	2018-05-23	310.69		Bead-beating
heartwood	5%_bleach,60%_EtOH,water	burr-grinding,bead-beating	1834-1843	air-dried,silica	GLOR07	none	STE+0.4%_SDS+6%_PVP+5mM_PTB	4	4	64.3	0.0802	0.124728	0.124728	2x_vol_99%_ethanol	failure	2018-05-23	198.61		Bead-beating
heartwood	5%_bleach,60%_EtOH,water	burr-grinding,bead-beating	1854-1863	air-dried,silica	GLOR07	none	STE+0.4%_SDS+6%_PVP+5mM_PTB	4	4	56.7	0.0674	0.118871	0.118871	2x_vol_99%_ethanol	failure	2018-05-23	174.97		Bead-beating
heartwood	5%_bleach,60%_EtOH,water	burr-grinding,bead-beating	1854-1863	air-dried,silica	GLOR07	none	STE+0.4%_SDS+6%_PVP+5mM_PTB	4	4	63.8	0.0554	0.0868339	0.0868339	2x_vol_99%_ethanol	failure	2018-05-23	121.598		Bead-beating
heartwood	5%_bleach,60%_EtOH,water	burr-grinding,bead-beating	1854-1863	air-dried,silica	GLOR07	none	STE+0.4%_SDS+6%_PVP+5mM_PTB	4	4	53.2	0.0644	0.121053	0.121053	2x_vol_99%_ethanol	failure	2018-05-23	169.513		Bead-beating
heartwood	5%_bleach,60%_EtOH,water	burr-grinding,bead-beating	1834-1843	air-dried,silica	GLOR07	TNE,MetOH+CaCl2+DTT	STE+0.4%_SDS+6%_PVP+5mM_PTB	4	4	38.7	0.0614	0.158656	0.158656	2x_vol_99%_ethanol+0.3x_vol_NaCl_5M		2018-06-07			GLOR07 single tube v2
heartwood	5%_bleach,60%_EtOH,water	burr-grinding,bead-beating	1834-1843	air-dried,silica	GLOR07	TNE,MetOH+CaCl2+DTT	STE+0.4%_SDS+6%_PVP+5mM_PTB	4	4	51.8	0.0548	0.105792	0.105792	2x_vol_99%_ethanol+0.3x_vol_NaCl_5M		2018-06-07			GLOR07 single tube v2
heartwood	5%_bleach,60%_EtOH,water	burr-grinding,bead-beating	1834-1843	air-dried,silica	GLOR07	TNE,MetOH+CaCl2+DTT	STE+0.4%_SDS+6%_PVP+5mM_PTB	4	4	55.8	0.0506	0.090681	0.090681	2x_vol_99%_ethanol+0.3x_vol_NaCl_5M		2018-06-07			GLOR07 single tube v2
heartwood	5%_bleach,60%_EtOH,water	burr-grinding,bead-beating	1854-1863	air-dried,silica	GLOR07	TNE,MetOH+CaCl2+DTT	STE+0.4%_SDS+6%_PVP+5mM_PTB	4	4	58	0.0502	0.0865517	0.0865517	2x_vol_99%_ethanol+0.3x_vol_NaCl_5M		2018-06-07		failure	GLOR07 single tube v2
heartwood	5%_bleach,60%_EtOH,water	burr-grinding,bead-beating	1854-1863	air-dried,silica	GLOR07	TNE,MetOH+CaCl2+DTT	STE+0.4%_SDS+6%_PVP+5mM_PTB	4	4	54.6	0.0612	0.112088	0.112088	2x_vol_99%_ethanol+0.3x_vol_NaCl_5M		2018-06-07		failure	GLOR07 single tube v2
heartwood	5%_bleach,60%_EtOH,water	burr-grinding,bead-beating	1854-1863	air-dried,silica	GLOR07	TNE,MetOH+CaCl2+DTT	STE+0.4%_SDS+6%_PVP+5mM_PTB	4	4	56.2	0.0482	0.0857651	0.0857651	2x_vol_99%_ethanol+0.3x_vol_NaCl_5M		2018-06-07		failure	GLOR07 single tube v2
heartwood	5%_bleach,60%_EtOH,water	burr-grinding,bead-beating	1874-1883	air-dried,silica	GLOR07	TNE,MetOH+CaCl2+DTT	STE+0.4%_SDS+6%_PVP+5mM_PTB	4	4	54.6	0.0472	0.0864469	0.0864469	2x_vol_99%_ethanol+0.3x_vol_NaCl_5M		2018-06-07		failure	GLOR07 single tube v2
heartwood	5%_bleach,60%_EtOH,water	burr-grinding,bead-beating	1874-1883	air-dried,silica	GLOR07	TNE,MetOH+CaCl2+DTT	STE+0.4%_SDS+6%_PVP+5mM_PTB	4	4	81.8	0.0748	0.0914425	0.0914425	2x_vol_99%_ethanol+0.3x_vol_NaCl_5M		2018-06-07		failure	GLOR07 single tube v2
heartwood	5%_bleach,60%_EtOH,water	burr-grinding,bead-beating	1874-1883	air-dried,silica	GLOR07	TNE,MetOH+CaCl2+DTT	STE+0.4%_SDS+6%_PVP+5mM_PTB	4	4	65.3	0.0552	0.0845329	0.0845329	2x_vol_99%_ethanol+0.3x_vol_NaCl_5M		2018-06-07		failure	GLOR07 single tube v2
heartwood	5%_bleach,60%_EtOH,water	burr-grinding,bead-beating	1894-1903	air-dried,silica	GLOR07	TNE,MetOH+CaCl2+DTT	STE+0.4%_SDS+6%_PVP+5mM_PTB	4	4	71.4	0.0626	0.0876751	0.0876751	2x_vol_99%_ethanol+0.3x_vol_NaCl_5M		2018-06-07		failure	GLOR07 single tube v2
heartwood	5%_bleach,60%_EtOH,water	burr-grinding,bead-beating	1894-1903	air-dried,silica	GLOR07	TNE,MetOH+CaCl2+DTT	STE+0.4%_SDS+6%_PVP+5mM_PTB	4	4	79.1	0.0724	0.0915297	0.0915297	2x_vol_99%_ethanol+0.3x_vol_NaCl_5M		2018-06-07		failure	GLOR07 single tube v2
heartwood	5%_bleach,60%_EtOH,water	burr-grinding,bead-beating	1894-1903	air-dried,silica	GLOR07	TNE,MetOH+CaCl2+DTT	STE+0.4%_SDS+6%_PVP+5mM_PTB	4	4	73	0.0662	0.0906849	0.0906849	2x_vol_99%_ethanol+0.3x_vol_NaCl_5M		2018-06-07		failure	GLOR07 single tube v2
heartwood	5%_bleach,60%_EtOH,water	burr-grinding,bead-beating	1914-1923	air-dried,silica	GLOR07	TNE,MetOH+CaCl2+DTT	STE+0.4%_SDS+6%_PVP+5mM_PTB	4	4	63.3	0.0642	0.101422	0.101422	2x_vol_99%_ethanol+0.3x_vol_NaCl_5M		2018-06-07		failure	GLOR07 single tube v2
heartwood	5%_bleach,60%_EtOH,water	burr-grinding,bead-beating	1914-1923	air-dried,silica	GLOR07	TNE,MetOH+CaCl2+DTT	STE+0.4%_SDS+6%_PVP+5mM_PTB	4	4	51.1	0.0456	0.0892368	0.0892368	2x_vol_99%_ethanol+0.3x_vol_NaCl_5M		2018-06-07		failure	GLOR07 single tube v2
heartwood	5%_bleach,60%_EtOH,water	burr-grinding,bead-beating	1914-1923	air-dried,silica	GLOR07	TNE,MetOH+CaCl2+DTT	STE+0.4%_SDS+6%_PVP+5mM_PTB	4	4	56	0.0654	0.116786	0.116786	2x_vol_99%_ethanol+0.3x_vol_NaCl_5M		2018-06-07		failure	GLOR07 single tube v2
heartwood	5%_bleach,60%_EtOH,water	burr-grinding,bead-beating	1954-1963	air-dried,silica	GLOR07	TNE,MetOH+CaCl2+DTT	STE+0.4%_SDS+6%_PVP+5mM_PTB	4	4	26.5	0.001	0.00377358	0.00377358	2x_vol_99%_ethanol+0.3x_vol_NaCl_5M		2018-06-07		success	GLOR07 single tube v2
heartwood	5%_bleach,60%_EtOH,water	burr-grinding,bead-beating	1892-1901	frozen	GLOR07	TNE,MetOH+CaCl2+DTT	STE+0.4%_SDS+6%_PVP+5mM_PTB	4	4	154.6	0.0148	0.00957309	0.00957309	2x_vol_99%_ethanol	failure	2018-06-19			GLOR07 frozen
heartwood	5%_bleach,60%_EtOH,water	burr-grinding,bead-beating	1892-1901	frozen	GLOR07	TNE,MetOH+CaCl2+DTT	STE+0.4%_SDS+6%_PVP+5mM_PTB	4	4	104.5	0.0188	0.0179904	0.0179904	2x_vol_99%_ethanol	failure	2018-06-19			GLOR07 frozen
heartwood	5%_bleach,60%_EtOH,water	burr-grinding,bead-beating	1892-1901	frozen	GLOR07	TNE,MetOH+CaCl2+DTT	STE+0.4%_SDS+6%_PVP+5mM_PTB	4	4	151.7	0.0156	0.0102835	0.0102835	2x_vol_99%_ethanol	failure	2018-06-19			GLOR07 frozen
heartwood	5%_bleach,60%_EtOH,water	burr-grinding,bead-beating	1902-1915	frozen	GLOR07	TNE,MetOH+CaCl2+DTT	STE+0.4%_SDS+6%_PVP+5mM_PTB	4	4	152	0.023	0.0151316	0.0151316	2x_vol_99%_ethanol	success	2018-06-19			GLOR07 frozen
heartwood	5%_bleach,60%_EtOH,water	burr-grinding,bead-beating	1902-1915	frozen	GLOR07	TNE,MetOH+CaCl2+DTT	STE+0.4%_SDS+6%_PVP+5mM_PTB	4	4	69.4	0.0238	0.0342939	0.0342939	2x_vol_99%_ethanol	success	2018-06-19			GLOR07 frozen
heartwood	5%_bleach,60%_EtOH,water	burr-grinding,bead-beating	1902-1915	frozen	GLOR07	TNE,MetOH+CaCl2+DTT	STE+0.4%_SDS+6%_PVP+5mM_PTB	4	4	120.5	0.0218	0.0180913	0.0180913	2x_vol_99%_ethanol	success	2018-06-19			GLOR07 frozen
heartwood	5%_bleach,60%_EtOH,water	burr-grinding,bead-beating	1915-1929	frozen	GLOR07	TNE,MetOH+CaCl2+DTT	STE+0.4%_SDS+6%_PVP+5mM_PTB	4	4	135.3	0.0214	0.0158167	0.0158167	2x_vol_99%_ethanol	success	2018-06-19			GLOR07 frozen
heartwood	5%_bleach,60%_EtOH,water	burr-grinding,bead-beating	1915-1929	frozen	GLOR07	TNE,MetOH+CaCl2+DTT	STE+0.4%_SDS+6%_PVP+5mM_PTB	4	4	140.4	0.024	0.017094	0.017094	2x_vol_99%_ethanol	success	2018-06-19			GLOR07 frozen
heartwood	5%_bleach,60%_EtOH,water	burr-grinding,bead-beating	1915-1929	frozen	GLOR07	TNE,MetOH+CaCl2+DTT	STE+0.4%_SDS+6%_PVP+5mM_PTB	4	4	84.9	0.0188	0.0221437	0.0221437	2x_vol_99%_ethanol	success	2018-06-19			GLOR07 frozen
heartwood	5%_bleach,60%_EtOH,water	burr-grinding,bead-beating	1930-1941	frozen	GLOR07	TNE,MetOH+CaCl2+DTT	STE+0.4%_SDS+6%_PVP+5mM_PTB	4	4	81	0.0238	0.0293827	0.0293827	2x_vol_99%_ethanol	success	2018-06-19			GLOR07 frozen	Positive control
heartwood	5%_bleach,60%_EtOH,water	burr-grinding,bead-beating	1930-1941	frozen	GLOR07	TNE,MetOH+CaCl2+DTT	STE+0.4%_SDS+6%_PVP+5mM_PTB	4	4	109.8	0.0294	0.026776	0.026776	2x_vol_99%_ethanol	success	2018-06-19			GLOR07 frozen	Positive control
heartwood	5%_bleach,60%_EtOH,water	burr-grinding,bead-beating	1930-1941	frozen	GLOR07	TNE,MetOH+CaCl2+DTT	STE+0.4%_SDS+6%_PVP+5mM_PTB	4	4	115.2	0.019	0.0164931	0.0164931	2x_vol_99%_ethanol	success	2018-06-19			GLOR07 frozen	Positive control
heartwood	5%_bleach,60%_EtOH,water	burr-grinding,bead-beating	1942-1961	frozen	GLOR07	TNE,MetOH+CaCl2+DTT	STE+0.4%_SDS+6%_PVP+5mM_PTB	4	4	159.2	0.0522	0.0327889	0.0327889	2x_vol_99%_ethanol	success	2018-06-19			GLOR07 frozen
heartwood	5%_bleach,60%_EtOH,water	burr-grinding,bead-beating	1942-1961	frozen	GLOR07	TNE,MetOH+CaCl2+DTT	STE+0.4%_SDS+6%_PVP+5mM_PTB	4	4	180.4	0.0226	0.0125277	0.0125277	2x_vol_99%_ethanol	success	2018-06-19			GLOR07 frozen
heartwood	5%_bleach,60%_EtOH,water	burr-grinding,bead-beating	1942-1961	frozen	GLOR07	TNE,MetOH+CaCl2+DTT	STE+0.4%_SDS+6%_PVP+5mM_PTB	4	4	168.9	0.0596	0.0352872	0.0352872	2x_vol_99%_ethanol	success	2018-06-19			GLOR07 frozen
heartwood	5%_bleach,60%_EtOH,water	burr-grinding,bead-beating	1962-1984	frozen	GLOR07	TNE,MetOH+CaCl2+DTT	STE+0.4%_SDS+6%_PVP+5mM_PTB	4	4	115.9	0.025	0.0215703	0.0215703	2x_vol_99%_ethanol	success	2018-06-19			GLOR07 frozen
heartwood	5%_bleach,60%_EtOH,water	burr-grinding,bead-beating	1962-1984	frozen	GLOR07	TNE,MetOH+CaCl2+DTT	STE+0.4%_SDS+6%_PVP+5mM_PTB	4	4	144.8	0.0272	0.0187845	0.0187845	2x_vol_99%_ethanol	success	2018-06-19			GLOR07 frozen
heartwood	5%_bleach,60%_EtOH,water	burr-grinding,bead-beating	1962-1984	frozen	GLOR07	TNE,MetOH+CaCl2+DTT	STE+0.4%_SDS+6%_PVP+5mM_PTB	4	4	131	0.0304	0.0232061	0.0232061	2x_vol_99%_ethanol	success	2018-06-19			GLOR07 frozen
sapwood	5%_bleach,60%_EtOH,water	burr-grinding,bead-beating	1985-2014	frozen	GLOR07	TNE,MetOH+CaCl2+DTT	STE+0.4%_SDS+6%_PVP+5mM_PTB	4	4	81.2	1.98	2.43842	2.43842	2x_vol_99%_ethanol	success	2018-06-19			GLOR07 frozen
sapwood	5%_bleach,60%_EtOH,water	burr-grinding,bead-beating	1985-2014	frozen	GLOR07	TNE,MetOH+CaCl2+DTT	STE+0.4%_SDS+6%_PVP+5mM_PTB	4	4	56.3	1.17	2.07815	2.07815	2x_vol_99%_ethanol	success	2018-06-19			GLOR07 frozen
sapwood	5%_bleach,60%_EtOH,water	burr-grinding,bead-beating	1985-2014	frozen	GLOR07	TNE,MetOH+CaCl2+DTT	STE+0.4%_SDS+6%_PVP+5mM_PTB	4	4	69.2	1.61	2.32659	2.32659	2x_vol_99%_ethanol	success	2018-06-19			GLOR07 frozen
heartwood	5%_bleach,60%_EtOH,water	burr-grinding,bead-beating	1837-1847	frozen	GLOR07	TNE,MetOH+CaCl2+DTT	STE+2%_SDS+6%_PVP+5mM_PTB	4	4	75.5	0.028	0.0370861	0.0370861	2x_vol_99%_ethanol	failure	2018-07-23			GLOR07 frozen
heartwood	5%_bleach,60%_EtOH,water	burr-grinding,bead-beating	1837-1847	frozen	GLOR07	TNE,MetOH+CaCl2+DTT	STE+2%_SDS+6%_PVP+5mM_PTB	4	4	97.5	0.32	0.328205	0.328205	2x_vol_99%_ethanol	failure	2018-07-23			GLOR07 frozen
heartwood	5%_bleach,60%_EtOH,water	burr-grinding,bead-beating	1837-1847	frozen	GLOR07	TNE,MetOH+CaCl2+DTT	STE+2%_SDS+6%_PVP+5mM_PTB	4	4	96.5	0.039	0.0404145	0.0404145	2x_vol_99%_ethanol	failure	2018-07-23			GLOR07 frozen
heartwood	5%_bleach,60%_EtOH,water	burr-grinding,bead-beating	1855-1867	frozen	GLOR07	TNE,MetOH+CaCl2+DTT	STE+2%_SDS+6%_PVP+5mM_PTB	4	4	144.5	0.0198	0.0137024	0.0137024	2x_vol_99%_ethanol	failure	2018-07-23			GLOR07 frozen
heartwood	5%_bleach,60%_EtOH,water	burr-grinding,bead-beating	1855-1867	frozen	GLOR07	TNE,MetOH+CaCl2+DTT	STE+2%_SDS+6%_PVP+5mM_PTB	4	4	140.6	0.0228	0.0162162	0.0162162	2x_vol_99%_ethanol	failure	2018-07-23			GLOR07 frozen
heartwood	5%_bleach,60%_EtOH,water	burr-grinding,bead-beating	1855-1867	frozen	GLOR07	TNE,MetOH+CaCl2+DTT	STE+2%_SDS+6%_PVP+5mM_PTB	4	4	128.8	0.0184	0.0142857	0.0142857	2x_vol_99%_ethanol	failure	2018-07-23			GLOR07 frozen
heartwood	5%_bleach,60%_EtOH,water	burr-grinding,bead-beating	1874-1885	frozen	GLOR07	TNE,MetOH+CaCl2+DTT	STE+2%_SDS+6%_PVP+5mM_PTB	4	4	85.6	0.0354	0.0413551	0.0413551	2x_vol_99%_ethanol	failure	2018-07-23			GLOR07 frozen
heartwood	5%_bleach,60%_EtOH,water	burr-grinding,bead-beating	1874-1885	frozen	GLOR07	TNE,MetOH+CaCl2+DTT	STE+2%_SDS+6%_PVP+5mM_PTB	4	4	121.7	0.0438	0.0359901	0.0359901	2x_vol_99%_ethanol	failure	2018-07-23			GLOR07 frozen
heartwood	5%_bleach,60%_EtOH,water	burr-grinding,bead-beating	1874-1885	frozen	GLOR07	TNE,MetOH+CaCl2+DTT	STE+2%_SDS+6%_PVP+5mM_PTB	4	4	105.1	0.0272	0.0258801	0.0258801	2x_vol_99%_ethanol	failure	2018-07-23			GLOR07 frozen
heartwood	5%_bleach,60%_EtOH,water	burr-grinding,bead-beating	1892-1901	frozen	GLOR07	TNE,MetOH+CaCl2+DTT	STE+2%_SDS+6%_PVP+5mM_PTB	4	4	219.6	0.0222	0.0101093	0.0101093	2x_vol_99%_ethanol	failure	2018-07-23			GLOR07 frozen
heartwood	5%_bleach,60%_EtOH,water	burr-grinding,bead-beating	1892-1901	frozen	GLOR07	TNE,MetOH+CaCl2+DTT	STE+2%_SDS+6%_PVP+5mM_PTB	4	4	253.5	0.001	0.000394477	0.000394477	2x_vol_99%_ethanol	failure	2018-07-23			GLOR07 frozen
heartwood	5%_bleach,60%_EtOH,water	burr-grinding,bead-beating	1892-1901	frozen	GLOR07	TNE,MetOH+CaCl2+DTT	STE+2%_SDS+6%_PVP+5mM_PTB	4	4	156.2	0.001	0.000640205	0.000640205	2x_vol_99%_ethanol	failure	2018-07-23			GLOR07 frozen
heartwood	5%_bleach,60%_EtOH,water	burr-grinding,bead-beating	1902-1915	frozen	GLOR07	TNE,MetOH+CaCl2+DTT	STE+2%_SDS+6%_PVP+5mM_PTB	4	4	114.8	0.0368	0.0320557	0.0320557	2x_vol_99%_ethanol	success	2018-07-23			GLOR07 frozen
heartwood	5%_bleach,60%_EtOH,water	burr-grinding,bead-beating	1902-1915	frozen	GLOR07	TNE,MetOH+CaCl2+DTT	STE+2%_SDS+6%_PVP+5mM_PTB	4	4	98.9	0.067	0.0677452	0.0677452	2x_vol_99%_ethanol	failure	2018-07-23			GLOR07 frozen
heartwood	5%_bleach,60%_EtOH,water	burr-grinding,bead-beating	1902-1915	frozen	GLOR07	TNE,MetOH+CaCl2+DTT	STE+2%_SDS+6%_PVP+5mM_PTB	4	4	101	0.0164	0.0162376	0.0162376	2x_vol_99%_ethanol	failure	2018-07-23			GLOR07 frozen
heartwood	5%_bleach,60%_EtOH,water	burr-grinding,bead-beating	1915-1929	frozen	GLOR07	TNE,MetOH+CaCl2+DTT	STE+2%_SDS+6%_PVP+5mM_PTB	4	4	146.6	0.0506	0.0345157	0.0345157	2x_vol_99%_ethanol	success	2018-07-23			GLOR07 frozen
heartwood	5%_bleach,60%_EtOH,water	burr-grinding,bead-beating	1915-1929	frozen	GLOR07	TNE,MetOH+CaCl2+DTT	STE+2%_SDS+6%_PVP+5mM_PTB	4	4	132.4	0.0808	0.0610272	0.0610272	2x_vol_99%_ethanol	failure	2018-07-23			GLOR07 frozen
heartwood	5%_bleach,60%_EtOH,water	burr-grinding,bead-beating	1915-1929	frozen	GLOR07	TNE,MetOH+CaCl2+DTT	STE+2%_SDS+6%_PVP+5mM_PTB	4	4	148.2	0.0432	0.0291498	0.0291498	2x_vol_99%_ethanol	success	2018-07-23			GLOR07 frozen
sapwood	5%_bleach,60%_EtOH,water	burr-grinding,bead-beating	1985-2014	frozen	GLOR07	TNE,MetOH+CaCl2+DTT	STE+2%_SDS+6%_PVP+5mM_PTB	4	4	95.3	2.14	2.24554	2.24554	2x_vol_99%_ethanol	success	2018-07-23			GLOR07 frozen
sapwood	5%_bleach,60%_EtOH,water	burr-grinding,bead-beating	1985-2014	frozen	GLOR07	TNE,MetOH+CaCl2+DTT	STE+2%_SDS+6%_PVP+5mM_PTB	4	4	112.2	1.93	1.72014	1.72014	2x_vol_99%_ethanol	success	2018-07-23			GLOR07 frozen
sapwood	5%_bleach,60%_EtOH,water	burr-grinding,bead-beating	1985-2014	frozen	GLOR07	TNE,MetOH+CaCl2+DTT	STE+2%_SDS+6%_PVP+5mM_PTB	4	4	70.9	2.56	3.61072	3.61072	2x_vol_99%_ethanol	success	2018-07-23			GLOR07 frozen
heartwood	60%_EtOH,water	burr-grinding,bead-beating	1965-1995	air-dried,silica	Dulwich	TNE	STE+0.2%_SDS+6%_PVP	4	4	27	0.0482	0.1785	0.1785	2x_vol_99%_ethanol					0.2% vs 2% SDS
heartwood	60%_EtOH,water	burr-grinding,bead-beating	1965-1995	air-dried,silica	Dulwich	TNE	STE+2%_SDS+6%_PVP	4	4	30	0.0426	0.142	0.142	2x_vol_99%_ethanol					0.2% vs 2% SDS
heartwood	60%_EtOH,water	burr-grinding,bead-beating	1965-1995	air-dried,silica	Dulwich	TNE	STE+0.2%_SDS+6%_PVP	4	4	24.4	0.0264	0.1082	0.1082	2x_vol_99%_ethanol					0.2% vs 2% SDS
heartwood	60%_EtOH,water	burr-grinding,bead-beating	1965-1995	air-dried,silica	Dulwich	TNE	STE+2%_SDS+6%_PVP	4	4	37.7	0.0386	0.1024	0.1024	2x_vol_99%_ethanol					0.2% vs 2% SDS
heartwood	60%_EtOH,water	burr-grinding,bead-beating	1965-1995	air-dried,silica	Dulwich	TNE	STE+0.2%_SDS+6%_PVP	4	4	28.7	0.027	0.0941	0.0941	2x_vol_99%_ethanol					0.2% vs 2% SDS
heartwood	60%_EtOH,water	burr-grinding,bead-beating	1965-1995	air-dried,silica	Dulwich	TNE	STE+2%_SDS+6%_PVP	4	4	23.5	0.021	0.0894	0.0894	2x_vol_99%_ethanol					0.2% vs 2% SDS
sapwood	5%_bleach,60%_EtOH,water	burr-grinding,bead-beating	2005-2014	air-dried,silica	Dulwich	TNE	STE+2%_SDS+6%_PVP	4	65	36.3	2.02	5.5647	5.5647	2x_vol_99%_ethanol					unknown
sapwood	5%_bleach,60%_EtOH,water	burr-grinding,bead-beating	2005-2014	air-dried,silica	Dulwich	TNE	STE+2%_SDS+6%_PVP	4	65	46.9	2.5	5.3305	5.3305	2x_vol_99%_ethanol					unknown
sapwood	5%_bleach,60%_EtOH,water	burr-grinding,bead-beating	2005-2014	air-dried,silica	Dulwich	TNE	STE+2%_SDS+6%_PVP	4	65	36.2	2.12	5.8564	5.8564	2x_vol_99%_ethanol					unknown
