# Supplementary material for: Extraction and high-throughput sequencing of oak heartwood DNA: Assessing the feasibility of genome-wide DNA methylation profiling
Source: PLoS One. 2021 Nov 18;16(11):e0254971. doi: 10.1371/journal.pone.0254971 (PMC8601515; doi:10.1371/journal.pone.0254971)
Supplement: S1 Table — Settings of the thermocycler for the PCR targeting oak sapwood and heartwood chloroplast and nuclear regions. (XLSX) [file pone.0254971.s002.xlsx]

## Sheet: Sheet1
S1 Table. Settings of the thermocycler for the amplification of oak DNA
step	temperature (°C)	time (minutes)	repetition
initial denaturation	94	2	1
denaturation	94	0.5	40
primer annealing	pirmer annealing temperature	1	40
primer extension	67	1 minute/1kb	40
final extension	67	5	1
