# Supplementary material for: Extraction and high-throughput sequencing of oak heartwood DNA: Assessing the feasibility of genome-wide DNA methylation profiling
Source: PLoS One. 2021 Nov 18;16(11):e0254971. doi: 10.1371/journal.pone.0254971 (PMC8601515; doi:10.1371/journal.pone.0254971)
Supplement: S2 Table — Sequences of the primers targeting the 203 bp region of the rbcl chloroplast gene used for the test on the amplification of sapwood and heartwood DNA. (XLSX) [file pone.0254971.s003.xlsx]

## Sheet: Sheet1
S2 Table. Sequences of the rbcl primers
primer id	sequence (5'-to-3')	targeted genome	targeted gene	targeted gene length (bp)
rbcl_F1	CTGGGACATGGACAACTGTG	Chloroplast	rbcl	203
rbcl_R1	CAGGGCCTTGAATCCAAATA
