# Supplementary material for: Extraction and high-throughput sequencing of oak heartwood DNA: Assessing the feasibility of genome-wide DNA methylation profiling
Source: PLoS One. 2021 Nov 18;16(11):e0254971. doi: 10.1371/journal.pone.0254971 (PMC8601515; doi:10.1371/journal.pone.0254971)
Supplement: S3 Table — Oak sapwood and heartwood DNA reads that were generated by the sequencing of the WGS/WGBS libraries. Total reads: percentage of them that were mapped to the oak genome. Map reads: reads mapped to the oak genome. Dedup map reads: reads mapped to the oak genome and removed from PCR duplicates. Dedup nuclear map reads: reads mapped to the oak nuclear genome and removed from PCR duplicates. The percentage of reads mapped to the oak genome before the removal of PCR duplicates is not reported for the WGBS libraries as bs-seeker2, the tool used for the alignment, automatically removes the duplicated reads [54]. Seq: high-throughput sequencing library strategy. (XLSX) [file pone.0254971.s004.xlsx]

## Sheet: S3_Table
S3 Table. Oak sapwood and heartwood WGS and WGBS sequencing metrics
Sample	wood type	Storage	Decontamination	DNA extraction buffer	Total reads	Mapped reads	Dedup map reads	Dedup nuclear map reads	Seq
GLOR01 2000-2014	sapwood	RT	Surface removal	STE 0.4% SDS 6% PVP 5mM PTB	8293182	86.08	82.48	80.60	WGS
GLOR01 1970-1980	heartwood	RT	Surface removal	STE 0.4% SDS 6% PVP 5mM PTB	18785120	84.76	60.33	58.28	WGS
GLOR01 1950-1960	heartwood	RT	Surface removal	STE 0.4% SDS 6% PVP 5mM PTB	11056112	69.84	47.87	45.79	WGS
GLOR01 1821-1830	heartwood	RT	Surface removal	STE 0.4% SDS 6% PVP 5mM PTB	15450192	0.83	0.73	0.70	WGS
GLOR01 1816-1820	heartwood	RT	Surface removal	STE 0.4% SDS 6% PVP 5mM PTB	14320566	0.26	0.14	0.10	WGS
GLOR01 1811-1815	heartwood	RT	Surface removal	STE 0.4% SDS 6% PVP 5mM PTB	16010180	0.24	0.15	0.13	WGS
GLOR02 1996-2014	sapwood	RT	Washings	STE 0.4% SDS 6% PVP 5mM PTB	19023748	85.65	68.97	66.45	WGS
GLOR02 1975-1995	heartwood	-20 ℃	Washings	STE 0.4% SDS 6% PVP 5mM PTB	926886	34.37	34.37	33.58	WGS
GLOR02 1925-1945	heartwood	-20 ℃	Washings	STE 0.4% SDS 6% PVP 5mM PTB	14007018	80.38	61.85	59.39	WGS
GLOR02 1800-1805	heartwood	-20 ℃	Washings	STE 2% SDS 6% PVP	10919350	0.28	0.27	0.27	WGS
GLOR03 1980-2013	sapwood	RT	Washings	STE 2% SDS 6% PVP	17374502	83.81	60.52	58.73	WGS
GLOR03 1962-1972	heartwood	RT	Washings	STE 2% SDS 6% PVP	9729056	80.60	69.35	68.00	WGS
GLOR07 1990-2014	sapwood	RT	Washings	STE 2% SDS 6% PVP	11676150	86.85	75.56	72.39	WGS
GLOR07 1964-1980	heartwood	RT	Washings	STE 2% SDS 6% PVP	22993900	86.18	75.10	74.11	WGS
GLOR07 1934-1943	heartwood	RT	Washings	STE 0.4% SDS 6% PVP 5mM PTB	15797326	77.88	48.36	45.59	WGS
GLOR07 1902-1915	heartwood	-20 ℃	Washings	STE 0.4% SDS 6% PVP 5mM PTB	7059496	75.07	54.31	51.68	WGS
GLOR03 1980-2013	sapwood	RT	Washings	STE 2% SDS 6% PVP	9395112	-	43.65	36.46	WGBS
GLOR03 1962-1972	heartwood	RT	Washings	STE 2% SDS 6% PVP	5205940	-	41.01	33.47	WGBS
GLOR07 1990-2014	sapwood	RT	Washings	STE 2% SDS 6% PVP	8621354	-	44.36	37.42	WGBS
GLOR07 1964-1980	heartwood	RT	Washings	STE 2% SDS 6% PVP	13795078	-	45.33	37.39	WGBS
